1        **Identification of a novel subfamily of bacterial AAT-fold basic amino acid decarboxylases**  
2        **and functional characterization of its first representative: *Pseudomonas aeruginosa* LdcA**

3  
4        **Diego Carriel-Lopez,<sup>1,2,#</sup> Pierre Simon Garcia,<sup>3,4,#</sup> Florence Castelli,<sup>5</sup> Patricia Lamourette,<sup>5</sup>**  
5        **François Fenaille,<sup>5</sup> Céline Brochier-Armanet,<sup>3,4,\*</sup> Sylvie Elsen<sup>2,\*\*</sup> and Irina Gutsche<sup>1,\*\*\*</sup>**

6  
7        <sup>1</sup>University of Grenoble Alpes, CNRS, CEA, CNRS, IBS, F-38000 Grenoble, France

8        <sup>2</sup>Biology of Cancer and Infection, U1036 INSERM, CEA, University of Grenoble Alpes, ERL5261  
9        CNRS, Grenoble, France

10       <sup>3</sup>Université Lyon 1, CNRS, UMR5558, Laboratoire de Biométrie et Biologie Évolutive, F-69622,  
11       Villeurbanne, France

12       <sup>4</sup>MMSB Molecular Microbiology and Structural Biochemistry, Institut de Biologie et de Chimie  
13       des Protéines 69367 LYON cedex 07, France

14       <sup>5</sup>Service de Pharmacologie et Immuno-Analyse (SPI), Laboratoire d'Etude du Métabolisme des  
15       Médicaments, CEA, INRA, Université Paris Saclay, MetaboHUB, F-91191 Gif-sur-Yvette, France

16  
17       For correspondence. \*E-mail [celine.brochier-armanet@univ-lyon1.fr](mailto:celine.brochier-armanet@univ-lyon1.fr); Tel. (33) 426234476; Fax  
18       (33) 472431388; \*\*E-mail [sylvie.elsen@cea.fr](mailto:sylvie.elsen@cea.fr); Tel. (33) 438783074; Fax (33) 438785058;  
19       \*\*\*E-mail [irina.gutsche@ibs.fr](mailto:irina.gutsche@ibs.fr); Tel. (33) 457428766; Fax (33) 438785122.

20  
21       **Short Title:** LdcA, a new phylogenetic family of bacterial Ldcs

22       **Key words:** bacterial amino acid decarboxylases, polyamines, evolution, lysine decarboxylase,  
23       *Pseudomonas aeruginosa*

24  
25       <sup>#</sup>These authors contributed equally to this work

26  
27

## 28 **Summary**

29 Polyamines are small amino-acid derived polycations capable of binding negatively charged  
30 macromolecules. Bacterial polyamines are structurally and functionally diverse, and are mainly produced  
31 biosynthetically by PLP-dependent amino acid decarboxylases referred to as LAOdcS (Lysine-Arginine-  
32 Ornithine decarboxylases). In a phylogenetically limited group of bacteria, LAOdcS are also induced in  
33 response to acid stress. Here, we performed an exhaustive phylogenetic analysis of the AAT-fold LAOdcS  
34 which showcased the ancestral nature of their short forms in *Cyanobacteria* and *Firmicutes*, and  
35 emergence of distinct subfamilies of long LAOdcS in *Proteobacteria*. We identified a novel subfamily of  
36 lysine decarboxylases, LdcA, ancestral in *Betaproteobacteria* and *Pseudomonadaceae*  
37 (*Gammaproteobacteria*). We analyzed the expression of LdcA from *Pseudomonas aeruginosa*, and  
38 uncovered its role, intimately linked to cadaverine production, in promoting growth and reducing  
39 persistence of this multidrug resistant human pathogen during carbenicillin treatment. Finally, we  
40 documented a certain redundancy in the function of the three main polyamines - cadaverine, putrescine  
41 and spermidine – in *P. aeruginosa* by demonstrating the link between their intracellular level, as well as  
42 the capacity of putrescine and spermidine to complement the growth phenotype of the *ldcA* mutant.

43

## 44 **Introduction**

45 Polyamines are small amino acid-derived molecules with two or more amino groups separated  
46 by alkyl chains (Tabor & Tabor, 1964, Lightfoot & Hall, 2014). They perform essential functions  
47 in all living organisms by participating in DNA replication, gene expression and protein synthesis,  
48 and are generally described as growth factors (Lightfoot & Hall, 2014, Michael, 2016b). At  
49 physiological pH, polyamines behave as polycations and can interact with negatively charged  
50 macromolecules such as nucleic acids, membrane phospholipids and proteins (Tabor & Tabor,

51 1964, Tabor & Tabor, 1985). They were proposed to bind and structurally modify RNA thereby  
52 acting at the level of translation (Igarashi & Kashiwagi, 2006, Igarashi & Kashiwagi, 2015).  
53 Strengthening this hypothesis, “polyamine modulons” were identified in *Escherichia coli* and  
54 more recently in eukaryotes (Igarashi & Kashiwagi, 2006, Igarashi & Kashiwagi, 2015). As a  
55 possible consequence, bacterial polyamines were shown to participate in expression of proteins  
56 essential for growth fitness and viability but also in processes such as biofilm formation,  
57 antibiotic resistance and virulence (Kwon & Lu, 2006, Shah & Swiatlo, 2008, Karatan & Michael,  
58 2013, Di Martino *et al.*, 2013, Michael, 2016a) .

59         The triamine spermidine (Spd), essential in eukaryotes and archaea (Lightfoot & Hall,  
60 2014, Michael, 2016b), and its diamine precursor putrescine (Put) are extensively studied  
61 because these two polyamines are the only ones produced in all eukaryotes (Michael, 2016b). In  
62 bacteria, the polyamine repertoire and hence their roles are the most diverse. In particular, a  
63 third widespread bacterial polyamine, cadaverine (Cad), appears increasingly important for the  
64 physiology of *Proteobacteria*. Cad is recognized as an important player in enterobacterial acid  
65 stress response wherein it decreases porin permeability to protons and alkalinizes the medium  
66 (Dela Vega & Delcour, 1996, Zhao & Houry, 2010). During oxidative stress response, Cad is also  
67 capable of scavenging reactive oxygen species (ROS) in *Vibrio vulnificus* (Kang *et al.*, 2007). In  
68 some Negativicutes, *Selenomonas ruminantium* and *Veillonella sp.*, Cad was shown to be  
69 incorporated in the peptidoglycan and essential for its stability (Kamio *et al.*, 1986, Kamio &  
70 Nakamura, 1987). Finally, this polyamine is involved in iron uptake and is required for the  
71 synthesis of hydroxamate-type siderophores in different bacterial species such as *Streptomyces*  
72 *coelicolor* (Burrell *et al.*, 2012).

73 Polyamine biosynthesis depends on the activity of basic amino acid decarboxylases using  
74 Lysine, Arginine or Ornithine as specific substrate to produce Cad, Agmatine (Agm) or Put,  
75 respectively. These enzymes can therefore be generally referred to as LAOdc (Lysine-Arginine-  
76 Ornithine decarboxylases). In most eukaryotes, Put synthesis is carried out by an ornithine  
77 decarboxylase (Odc) (Michael, 2016a, Michael, 2016b). An alternative pathway for Put  
78 biosynthesis found in bacteria and plants involves decarboxylation of arginine by arginine  
79 decarboxylases (Adc); these enzymes produce Agm which is further converted into Put by  
80 agmatine iminohydrolase/deiminase and N-carbamoylputrescine amidohydrolase (Michael,  
81 2016a, Michael, 2016b). Interestingly, plants (Lee & Cho, 2001, Bunsupa *et al.*, 2012) and some  
82 bacteria exemplified by *S. ruminantium* and *V. vulnificus* (Takatsuka *et al.*, 2000, Lee *et al.*, 2007)  
83 possess a bifunctional Odc/Ldc capable of synthesizing both Put and Cad. Spd is formed by  
84 spermidine synthase (SpdSyn) through aminopropylation of Put, using an aminopropyl group  
85 released by decarboxylation of S-adenosylmethionine (Michael, 2016a, Michael, 2016b). In  
86 addition, *E. coli* SpdSyn transforms Cad into aminopropyl-Cad, a Spd analogue sharing its growth  
87 stimulating properties (Kim *et al.*, 2016).

88 Two major structural protein super-families are responsible for polyamine biosynthesis  
89 through pyridoxal-5-phosphate (PLP)-dependent LAOdc: the alanine racemase fold (AR-fold)  
90 super-family and the aspartate aminotransferase fold (AAT-fold) super-family (Eliot & Kirsch,  
91 2004). Phylogenetic studies of the LAOdc of the AR-fold super-family revealed that these  
92 enzymes are widespread throughout the three domains of life while the AAT-fold LAOdc are  
93 found exclusively in Bacteria and a few archaea (Lee *et al.*, 2007, Burrell *et al.*, 2010). Bacterial  
94 AAT-fold LAOdc can be divided in two types according to the presence or absence of a

95 particular CheY-like response regulator receiver domain, known as the “wing domain”,  
96 necessary for the formation of higher-order oligomers (Burrell *et al.*, 2010, Kanjee *et al.*, 2011b).  
97 The short form referred as wing-less LAOdc was found in *Firmicutes*, *Cyanobacteria* and  
98 *Actinobacteria* phyla, and a few “wing-less” AAT-fold decarboxylases from *Firmicutes* and  
99 *Actinobacteria* were shown to have an Adc activity, required in particular for biofilm formation  
100 in *Bacillus subtilis* (*Firmicutes*) (Burrell *et al.*, 2010). The long, wing domain-containing form  
101 likely originated in *Proteobacteria* (Kanjee *et al.*, 2011b).

102 AAT-fold decarboxylases with the wing domain have been intensively studied in  
103 *Enterobacteria* since the early 1940s (Gale & Van Heyningen, 1942, Gale & Epps, 1944) because  
104 of the link between enterobacterial pathogenicity for humans and their capacity to withstand  
105 acid stress thanks to the crucial role of the inducible LAOdc. Consequently, the current  
106 understanding of the AAT-fold LAOdc is based on analyses of a very limited number of bacterial  
107 species, *i.e.* mostly *enterobacteria*: *E. coli*, *Salmonella typhimurium*, *Vibrio cholerae* and *V.*  
108 *vulnificus*. At a specific acidic pH, expression of the decarboxylase gene is induced by an excess  
109 of the target amino acid uptaken by a dedicated inner membrane antiporter (Kanjee & Houry,  
110 2013). The enzyme transforms the amino acid substrate into the corresponding polyamine upon  
111 consumption of a proton and production of a CO<sub>2</sub> molecule. In association with the polyamine  
112 excretion by the antiporter, this reaction results in an efficient buffering of the intracellular  
113 medium and the extracellular surroundings. These inducible stress response decarboxylases are  
114 distinguished from “biosynthetic” enzymes that are involved only in polyamine biosynthesis. *E.*  
115 *coli* encodes two biosynthetic decarboxylases (LdcC: Lys->Cad and OdcC/SpeC: Orn->Put)  
116 responsible for Cad and Put biosynthesis respectively, and three acid stress-inducible

117 decarboxylases (Ldcl: Lys->Cad, Adcl/AdiA: Arg->Agm and Odcl/SpeF: Orn->Put) which together  
118 constitute a very robust acid stress response system that allows the bacterium to survive upon  
119 acid stress as low as pH 2.0 (Zhao & Houry, 2010, Kanjee *et al.*, 2011a, Kanjee & Houry, 2013).  
120 The importance of Ldcl was also demonstrated in *S. typhimurium*, *V. cholerae* and *V. vulnificus*,  
121 where it promotes growth and survival under acidic conditions but also confers protection from  
122 oxidative stress insults (Merrell & Camilli, 2000, Kang *et al.*, 2007, Viala *et al.*, 2011)). It should  
123 be noted that Ldcl-encoding genes are often designated as *cadA* as originally proposed upon  
124 identification of this gene in *E. coli* (Tabor *et al.*, 1980).

125 *E. coli* Ldcl but not LdcC interacts with the AAA+ ATPase RavA to assemble into a huge  
126 macromolecular cage (Snider *et al.*, 2006, El Bakkouri *et al.*, 2010, Malet *et al.*, 2014, Kandiah *et*  
127 *al.*, 2016). One of the functions of this mysterious complex is to protect Ldcl from inhibition by  
128 the stringent response alarmone ppGpp, thus enabling the bacterium to efficiently cope with  
129 both acid and nutrient stress simultaneously (El Bakkouri *et al.*, 2010, Kanjee *et al.*, 2011a, Malet  
130 *et al.*, 2014). While investigating why RavA binds only Ldcl but not LdcC, we documented  
131 numerous inconsistencies in annotation of enterobacterial *ldcl* and *ldcC* genes and realized that  
132 each of these two families appeared to have a distinct genetic context (Kandiah *et al.*, 2016).  
133 Thus, spurred on by the limited nature of the previous studies, we set out to perform an  
134 extensive phylogenetic analysis of the AAT-fold LAOdcS in circa 4,500 complete prokaryotic  
135 proteomes to decipher the evolutionary history of these proteins and their functional evolution.  
136 In the present study, we revealed the ancestral nature of the wing-less LAOdcS in *Cyanobacteria*  
137 and *Firmicutes*, and the complex evolutionary history of long AAT-fold LAOdcS in *Proteobacteria*,  
138 leading to the emergence of distinct subfamilies. Moreover, we disclosed a novel subfamily of

139 enzymes, clearly distinct from the well-known Ldcl, LdcC, Adcl, Odcl and OdcC families, but  
140 more related to Ldc and Adc than to Odc. Excitingly, this novel evolutionary subfamily has been  
141 overlooked in previous phylogenetic analyses in spite of its wide distribution in  
142 *Betaproteobacteria* and *Pseudomonadaceae*, implying that it deserves a thorough  
143 characterization and a functional comparison with the known AAT-fold long LAOdc. The only  
144 previously mentioned LAOdc from these taxa is the lysine decarboxylase LdcA from a major  
145 multidrug resistant opportunistic human pathogen *Pseudomonas aeruginosa* (Chou *et al.*,  
146 2010). Thus, here we went beyond the initial characterization of the *P. aeruginosa* LdcA (Chou  
147 *et al.*, 2010), and further analyzed its expression, regulation, and function in the light of the  
148 available knowledge in particular on *E. coli* Ldcl and LdcC. This combined phylogenetic and  
149 functional study revealed that LdcA belongs to a novel subgroup of the long AAT-fold LAOdc,  
150 and that its function is linked to Cad production and to the general polyamine metabolism  
151 rather than to stress response.

152

## 153 **Results**

### 154 *Taxonomic distribution of AAT-fold LAOdc in prokaryotes*

155 An in-depth survey of 4,466 prokaryotic proteomes representing 1,904 species revealed  
156 4,090 protein sequences belonging to the AAT-fold LAOdc (13 of which were unannotated or  
157 annotated as pseudo-genes) (Fig. S1A). Representatives of this super-family are mainly present  
158 in Bacteria, especially in *Proteobacteria*, *Firmicutes*, *Actinobacteria* and *Cyanobacteria*, while  
159 only seven sequences were detected in *Archaea* (Fig. S1A), indicating that AAT-fold LAOdc are  
160 very likely of bacterial origin. The corresponding Maximum Likelihood (ML) tree could be

161 divided in three parts (Fig. S1B). Cluster I encompasses sequences devoid of the wing domain  
162 (short AAT-fold LAOdc) (Bootstrap value (BV) = 99%). They are mainly found in *Firmicutes*,  
163 *Cyanobacteria* and *Actinobacteria*. Cluster II gathers nearly all proteobacterial sequences and a  
164 few sequences from *Firmicutes* (BV = 99%), all containing a wing domain. Cluster III branches in-  
165 between Cluster I and Cluster II; it is composed of a mix of long and short AAT-fold LAOdc  
166 sequences from unrelated taxonomic groups (*Proteobacteria*, *Actinobacteria*, *Bacteroidetes*,  
167 and *Firmicutes*), strongly suggesting that they spread through horizontal gene transfers among  
168 these lineages.

169

#### 170 *Wingless AAT-fold LAOdc are ancestral in Firmicutes and Cyanobacteria*

171 Within Cluster I, all cyanobacterial sequences group together albeit with a weak  
172 bootstrap value (BV) (Fig. 1A). They are widely distributed in this phylum (Fig. 2). The phylogeny  
173 inferred with these sequences (Fig. 2A) is overall consistent with a reference phylogeny of  
174 *Cyanobacteria* based on ribosomal proteins (Fig. 2B). This indicates that a gene coding for a  
175 wing-less AAT-fold LAOdc was likely present in the ancestor of *Cyanobacteria* and had been  
176 mainly transmitted vertically in *Cyanobacteria*. The genomic context of LAOdc in *Cyanobacteria*  
177 is not conserved even in relatively close species (Fig. 2C).

178 Similarly, sequences of *Firmicutes* belonging to Cluster I are widely distributed in this  
179 phylum (Fig. 1). The comparison of the phylogeny inferred with these sequences (Fig. 1A) with a  
180 reference phylogeny of *Firmicutes* (Fig. 1B) suggests that a gene coding for a short AAT-fold  
181 LAOdc was present in the ancestor of this phylum. Noteworthy, most of members of *Firmicutes*  
182 harbor two LAOdc copies (referred as A and B), with exception of the most early-branching



183 lineages: one single gene corresponding to the copy A is found in *Natranaerobiaceae*, while no  
184 gene is found in *Halobacteroidaceae* and *Halanaerobiaceae* (Fig. 1B). These two copies can be  
185 easily distinguished by their genomic context (Fig. 1C): the copy A presents a well-conserved  
186 association with thymidylate kinase and DNA polymerase III subunit delta coding genes, while  
187 the genomic context of copy B was not conserved. The presence of gene coding for a copy A in  
188 the early diverging *Natranaerobiaceae* lineage and in most *Firmicutes* taxa suggests that the  
189 copy A could be ancestral in *Firmicutes*. In contrast, the copy B seems to appear in the common  
190 ancestor shared by *Clostridia* and *Bacilli*, possibly as the result of a gene duplication event.  
191 Worthy of note, a loss of both copies can be inferred in the ancestor of *Lactobacillales*. Yet,  
192 some *Streptococcaceae* and *Carnobacteriaceae* have reacquired either copy A or copy B by  
193 horizontal gene transfer from different *Firmicutes* donors (Fig. 1A). Finally, Cluster I  
194 encompassed a group of sequences from *Actinobacteria*. Their taxonomic distribution is patchy  
195 and their phylogeny is not consistent with the current taxonomy, suggesting that they have  
196 been acquired and spread through horizontal gene transfer in *Actinobacteria*.

197

#### 198 *Wing-domain containing AAT-fold LAOdc form four groups in Proteobacteria*

199 The phylogenetic analysis of proteobacterial AAT-fold LAOdc's composing the Cluster II  
200 revealed two monophyletic groups, corresponding to Odc (Posterior probabilities (PP) = 1, Fig.  
201 3A and BV = 100%, Fig. 3B) and LAdc (PP = 1, Fig. 3A and BV = 100%, Fig. 3B). The LAdc group is  
202 further split into LdcI/LdcC (PP = 1, Fig. 3A and BV = 100%, Fig. 3B), Adc (PP = 1, Fig. 3A and BV =  
203 93, Fig. 3B), and a hitherto non-identified subfamily (PP = 1, Fig. 3A and BV = 100%, Fig. 3B), that  
204 will be referred as LdcA in the name of its only previously mentioned member, LdcA from *P.*

205 *aeruginosa* (Chou *et al.*, 2010). It should be emphasized that although the monophyly of  
206 Odcl/OdcC, Ldcl/LdcC, Adc and LdcA groups is well supported, the relationships among  
207 Ldcl/LdcC, Adc and LdcA are unresolved (PP = 0.67, Fig. 3A and BV < 80%, Fig. 3B).

208         The comparison of the LAOdc phylogeny (Fig. 3B) and taxonomic distribution with a  
209 reference phylogeny of *Proteobacteria* (Fig. 4A) suggests that *odcl* could be ancestral in  
210 *Bradyrhizobiaceae*, *Xanthobacteriaceae*, *Methylobacteriaceae*, and *Beijerinckiaceae* (all  
211 belonging to *Alphaproteobacteria*), as well as in *Vibrionaceae*, *Pasteurellaceae*, and  
212 *Enterobacteriaceae* (all belonging to *Gammaproteobacteria*). In contrast, *odcC* seems more  
213 recent and appears to result from a gene duplication of *odcl* that occurred in  
214 *Enterobacteriaceae*, before the divergence of *Sodalis* (PP = 1, Fig. 3A and BV = 75%, Fig. 3B, and  
215 Fig. 4B). Genes coding for Odcl and OdcC are clearly distinguished by their context (Fig. S2).  
216 More precisely, *odcl* is predominantly upstream from a gene (*potE*) coding for a putrescine-  
217 ornithine antiporter, consistently with the function of Odcl that converts Orn to Put. In contrast,  
218 OdcC coding genes are located in the vicinity of Fe<sup>2+</sup>-trafficking protein (*yggX*), a lytic murein  
219 transglycosylase (*mltC*) genes, an A/G-specific adenine glycosylase (*mutY*), a tRNA  
220 (guanosine(46)-N7)-methyltransferase (*trmB*) and an hypothetical protein. Interestingly, a few  
221 horizontal gene transfers of *odcl* occurred from *Proteobacteria* to unrelated *firmicutes*: some  
222 *Lactobacillus*, *Staphylococcus lugdunensis*, and *Megasphaera elsdenii*.

223         Ldcl, also called *cadA*, appears to be ancestral in some gammaproteobacterial lineages  
224 (*Francisellaceae*, *Aeromonadaceae*, *Vibrionaceae* and *Enterobacteriaceae*, Fig. 4A). Moreover,  
225 similar to *odcl/odcC*, *ldcC* apparently derived from *ldcl*, and more precisely from a gene  
226 duplication that occurred, as for *odcl*, just before the emergence of *Sodalis* (PP = 1, Fig. 3A and

227 BV = 100%, Fig. 3B, and Fig. 4B). The *ldcI* gene forms the *cadBA* operon together with the lysine-  
228 cadaverine antiporter-encoding the *cadB* gene. In *Enterobacteriaceae*, this operon is known to  
229 be regulated by the transcriptional factor CadC integrating three external signals – low pH, high  
230 lysine and low Cad levels (Kuper & Jung, 2005, Fritz *et al.*, 2009). Our analysis confirmed the  
231 conserved genomic organization of the *cadCBA* system (Fig. S2) (Zhao & Houry, 2010) allowing  
232 *Enterobacteria* to face acid and oxidative stresses. The *ldcC* genomic context seems to be also  
233 strongly conserved (Fig. S2) with genes coding for hydroxymyristol acyl carrier protein  
234 dehydratase, UDP-N-acetylglucosamine acetyltransferase, tetraacyldisaccharide-1-P synthase,  
235 ribonuclease HIII, DNA polymerase III alpha subunit, acetyl-CoA carboxylase 2C alpha subunit  
236 upstream and putative lyase and tRNA(Ile)-lysidine synthetase genes downstream.

237 In sharp contrast with Odcl/OdcC and Ldcl/LdcC, the Adc group presents a patchy  
238 taxonomic distribution and the relationships among Adc sequences are at odds with current  
239 systematics, with sequences from different classes of *Proteobacteria* being intermixed on the  
240 tree (Fig. 3B and Fig. 4). This indicates that the Adc subfamily was heavily impacted by  
241 horizontal gene transfers. The genomic context of *adc* is not conserved (Fig. S2), precluding  
242 identification of potential functional partners. Interestingly, the *Burkholderia* sp. AIU 395 LAOdc  
243 that locates in the Adc group was shown to possess a lysine decarboxylase and oxidase activity  
244 (Sugawara *et al.*, 2014).

245

#### 246 *Phylogenetic analyses of LAOdc disclose a fourth group in Proteobacteria*

247 As specified above, beside Odcl/C, Ldcl/C and Adc, a fourth group of LAOdc sequences is  
248 present in the tree. This group contains LdcA from *P. aeruginosa*, shown to possess a lysine

249 decarboxylase activity (Chou *et al.*, 2010). Homologues of LdcA are found in other  
250 *Pseudomonadaceae* and in *Betaproteobacteria*. Both groups of sequences are well separated on  
251 the tree and widely distributed in these two taxa, with relationships globally in agreement with  
252 the current taxonomy. This suggests that an LdcA homologue was present in the ancestor of  
253 *Pseudomonadaceae* and in the ancestor of *Betaproteobacteria* and has been globally well  
254 conserved along the diversification of these two taxa. The genetic environment of *ldcA* is not  
255 conserved (Fig. S2). To our knowledge, the only publication describing a member of the LdcA  
256 subfamily concerns *P. aeruginosa*, a highly versatile bacterium that efficiently grows on arginine  
257 but not on lysine (Fothergill & Guest, 1977, Rahman & Clarke, 1980). In this organism exhibiting  
258 tightly interconnected lysine and arginine catabolism networks (Chou *et al.*, 2010, Madhuri  
259 Indurthi *et al.*, 2016), the *PA1818* gene was identified as a part of the ArgR regulon upon growth  
260 on excess arginine, but was surprisingly found to code for a lysine decarboxylase, and not for an  
261 arginine decarboxylase as one would have logically supposed, and therefore called *ldcA* (Chou *et*  
262 *al.*, 2010, Madhuri Indurthi *et al.*, 2016). *P. aeruginosa* is a major cause of gram-negative  
263 infections, especially in patients with compromised and weakened immune system. This  
264 opportunistic pathogen is also a well-identified threat for patients suffering from Cystic Fibrosis  
265 (CF), because the chronic respiratory infections associated to host inflammatory responses lead  
266 to pulmonary tissue destruction and lung failure (Bodey *et al.*, 1983, Gellatly & Hancock, 2013).  
267 The occurrence and persistence of *P. aeruginosa* in the CF patients' lungs, whose secretions  
268 were shown to be acidified and to become oxidative (Pezzulo *et al.*, 2012), hints to a possible  
269 role of LdcA in promoting bacterial fitness. Therefore, in the following sections, we chose to  
270 deepen the present knowledge on expression, regulation and functional characterization of *P.*

271 *aeruginosa* LdcA.

272

273 *LdcA* expression is growth-phase dependent

274 To determine the role of the LdcA protein in *P. aeruginosa*, the prerequisite was to know  
275 when the protein is produced by the bacterium and what are the mechanisms controlling its  
276 production. Thus, we first analyzed the expression of its gene by creating a transcriptional  
277 fusion between the *ldcA* promoter (*P<sub>ldcA</sub>*) and the reporter *lacZ* gene. The fusion was then  
278 integrated into the chromosome of PAO1 (see Materials and Methods for further details), the  
279 first *P. aeruginosa* sequenced strain (Stover *et al.*, 2000) considered as a reference strain and  
280 widely studied. We then measured the  $\beta$ -galactosidase activity of the PAO1::*P<sub>ldcA</sub>-lacZ* strain  
281 grown in a minimal medium P (MMP) containing glutamate as a carbon source and lysine or  
282 arginine (20mM) as additives. Unlike lysine, arginine was able to induce the expression of *ldcA* in  
283 PAO1::*P<sub>ldcA</sub>-lacZ* (not shown), in agreement with published data identifying ArgR as a positive  
284 regulator of *ldcA* expression in the PAO1 strain (Lu *et al.*, 2004, Chou *et al.*, 2010).

285 The pattern of *ldcA* expression was followed during the growth both in minimal and rich  
286 media. In MMP medium supplemented with glutamate and arginine (MMP-GR), the  $\beta$ -  
287 galactosidase activity increased slightly but continuously along the growth and reached a  
288 maximum in the stationary phase (Fig. 5A). Expression of *ldcA* in LB rich medium followed the  
289 same pattern of expression (Fig. 5B), that was paralleled by an increase in LdcA protein amount  
290 assessed by western blot (not shown). The expression level obtained in LB was two-fold lower  
291 than the one measured in MMP-GR. Addition of 20 mM arginine to LB did not change the growth  
292 rate of the bacteria but the *ldcA* promoter activity increased during the transition to the

293 stationary phase to reach a level similar to the one measured in MMP-GR (Fig. 5B), indicating a  
294 probable limiting concentration of the amino acid in LB at late growth.

295

296 *LdcA expression differs from that of LdcC and LdcI*

297 The *ldcA* genomic context being different from that of *ldcI* and *ldcC* genes (Fig. S2), we  
298 wondered if *ldcA* was also regulated differently than these genes; this knowledge could further  
299 provide information on its role in *P. aeruginosa* physiology. Even if *E. coli* LdcC is called  
300 “constitutive Lysine Decarboxylase”, the corresponding gene was shown to be induced in  
301 stationary phase in LB medium by RpoS, the sigma factor of stationary phase (Kikuchi *et al.*,  
302 1998). However, *ldcA* expression was not affected in a *rpoS* mutant background (data not  
303 shown), in agreement with previous transcriptomic analyses demonstrating that *ldcA* is not part  
304 of the RpoS regulon (Schuster *et al.*, 2004). To compare with *LdcI*, the “inducible Lysine  
305 Decarboxylase”, despite the absence of a CadC homologue in *P. aeruginosa*, we assessed if acid  
306 stress could activate the expression of *ldcA* in a CadC-independent manner. Hence, we induced  
307 acid stress by decreasing the pH of the medium to a value of 5 during the exponential phase of  
308 growth and documented an absence of effect of this treatment on *ldcA* expression (Fig. S3A). In  
309 addition, *ldcI* from *V. vulnificus* was reported to be induced by SoxR upon H<sub>2</sub>O<sub>2</sub> stress (Kim *et al.*,  
310 2006). In *P. aeruginosa*, SoxR is not a key player in the oxidative stress response, but H<sub>2</sub>O<sub>2</sub>  
311 activates the global regulator OxyR that orchestrates the defense against ROS (Ochsner *et al.*,  
312 2000). Yet, addition of 1 mM of H<sub>2</sub>O<sub>2</sub> in the culture did not affect *ldcA* expression (Fig. S3A). To  
313 conclude, *P. aeruginosa* does not overexpress *ldcA* to respond to low pH or oxidative stress  
314 conditions.

315

316 *Low pH survival is not affected in absence of LdcA*

317 To clarify the function of LdcA in *P. aeruginosa*, a mutant deleted of the *ldcA* gene, as  
318 well as a complemented strain in which one copy of *ldcA* driven by its own promoter was  
319 inserted in the chromosome, were engineered (see Materials and Methods). Using Biolog  
320 system, a Phenotype MicroArray analysis was carried out to test a large number of stress  
321 conditions in systematical and reproducible manner. A potential role of LdcA in detoxifying and  
322 protecting *P. aeruginosa* during acid, alkaline and oxidative stress, antibiotic treatment and toxic  
323 molecules causing DNA damage, nitrosative stress, and membrane destabilization was assessed.  
324 After monitoring the growth of *P. aeruginosa* in the different conditions in minimal medium  
325 during 24 hours (see Materials and Methods), the “Area Under the Curve” (AUC) in each  
326 condition was calculated and compared between the strains. Analysis of the growth fitness of  
327 wild-type, mutant and complemented strains indicated that *P. aeruginosa* could grow optimally  
328 in a pH range from 5 to 10 without considerable effect on the metabolism and biomass growth.  
329 At pH 4 to 5, the bacterial growth started to be strongly inhibited and the strains were unable to  
330 grow below pH 4 (Fig. S3B). This set of experiments did not show any significant difference  
331 between the mutant and the wild-type and complemented strains, pointing to a non-  
332 involvement of LdcA in survival at low pH. Similarly, no significant effect of *ldcA* absence on  
333 resistance against antibiotics, oxidative and toxic agents could be detected (not shown). Hence  
334 LdcA seems not to be important for stress response.

335

336 *The Cad pool generated by LdcA impacts persistence phenotype and polyamine content*

337 In our quest for deciphering the importance of LdcA in bacterial physiology, we analyzed  
338 the role of its product Cad shown to play a fundamental role in *P. aeruginosa* virulence. Indeed,  
339 this polyamine was reported to be involved in the persistence of the bacterium which is of  
340 importance for its eradication by antibiotics; specifically, Cad production was shown to lead to a  
341 reduction of the dormant cells that form an antibiotic-tolerant subpopulation in MH medium  
342 (Manuel *et al.*, 2010).

343 Therefore, to assess the role of LdcA in persistence, we first confirmed the impact of *ldcA*  
344 mutation on Cad production in this rich MH medium. To do so, we quantified the intracellular  
345 Cad amounts in the bacterial strains by liquid chromatography coupled to high resolution mass  
346 spectrometry (LC/HRMS) during early-, mid- and late-exponential growth phases. Cad was  
347 completely absent in the *ldcA* mutant and complementation with a wild-type *ldcA* copy restored  
348 the metabolite level in the strain, indicating that, in PAO1, this polyamine is produced  
349 exclusively through the enzymatic activity of LdcA in this growth condition (Fig. 6). Moreover,  
350 the wild-type strain showed an impressive increase (around 25-fold) of Cad concentration  
351 during the growth, probably reflecting the *ldcA* expression pattern in rich medium (increase  
352 during exponential growth, Fig. 5B).

353 Then, the impact of *ldcA* on the number of persisters during carbenicillin treatment was  
354 assessed. As anticipated, *ldcA* mutant showed a number of persisters significantly higher  
355 compared to the wild-type PAO1 and complemented strains (Fig. S4), confirming the  
356 importance of LdcA activity in the persistence phenotype.

357 Interestingly, in parallel to Cad, we also quantified the intracellular concentrations of two  
358 other polyamines, Put and Spd, in the wild-type strain and *ldcA* mutant (Fig. 6). While in the



359 wild-type PAO1, the amount of Cad is clearly growth-phase dependent, the amounts of Put and  
360 Spd were found to be abundant and constant in the MH medium. Remarkably, inactivation of  
361 *ldcA* affected not only the production of Cad but also the amount of intracellular Put and Spd  
362 which were reduced by around two-fold in the *ldcA* mutant at late exponential growth. This  
363 could either indicate a higher turnover of polyamine metabolism in the *ldcA* mutant or a  
364 reduced production of Put and Spd as a compensation for the absence of Cad.

365

### 366 *Polyamines are important for growth fitness*

367 As mentioned above, LdcA synthesis is induced in minimal MMP medium in presence of  
368 arginine. Therefore, we monitored the growth of the *ldcA* mutant in this condition in presence  
369 of either lysine, the substrate of LdcA, or Cad, the product of its enzymatic transformation. The  
370 observed clear reduction of growth of the *ldcA* mutant highlighted the metabolic role of the  
371 enzyme, whereas wild-type growth was restored in the complemented strain (Fig. 7A). Addition  
372 of exogenous Cad was sufficient to restore a normal growth in the mutant indicating that the  
373 limiting factor was indeed the polyamine product (Fig. 7B). Strikingly, growth was also restored  
374 when Put (Fig. 7C) or Spd (Fig. 7D) were added to the growth medium at the same  
375 concentrations, indicating that these polyamines can substitute for Cad as a growth factor.

376

## 377 **Discussion**

378 The present exhaustive phylogenetic analysis of the AAT-fold LAOdcS super-family  
379 indicates that wing-less enzymes were ancestral in *Firmicutes*, in agreement with earlier reports  
380 (Sekowska *et al.*, 1998, Burrell *et al.*, 2010). This analysis highlights also the ancestral presence

381 of wing-less AAT-fold LAOdc in *Cyanobacteria*. Yet, no LAOdc activity of a cyanobacterial AAT-  
382 fold enzyme has been documented despite their purification from *Anabaena variabilis* and  
383 *Nostoc punctiforme* (Burrell *et al.*, 2010). We show that wing domain-containing AAT-fold LAOdc  
384 emerged during the diversification of *Proteobacteria*, suggesting that short AAT-fold LAOdc  
385 could be more ancient and that the acquisition of the CheY-like wing domain occurred likely  
386 secondarily, as previously proposed (Burrell *et al.*, 2010, Kanjee *et al.*, 2011a). The absence of  
387 AR-fold decarboxylases in *Firmicutes* (Burrell *et al.*, 2010, Michael, 2016a) implies that their AAT-  
388 fold decarboxylases would be the only route for polyamine biosynthesis and thus emphasizes  
389 the importance of these enzymes in this phylum. The *Firmicutes* AAT-fold LAOdc correspond to  
390 two copies, likely paralogues (A and B), present in most species and easily distinguishable by  
391 their genomic context. These two copies result from a duplication event that occurred very early  
392 during diversification of the phylum, probably in the ancestor of Clostridia and Bacilli (Fig. S1).  
393 Copy A encompasses the *B. subtilis yaaO* (Sekowska *et al.*, 1998), while copy B contains the *B.*  
394 *subtilis speA* gene coding for an arginine decarboxylase (NP\_389346.1) (Burrell *et al.*, 2010). Two  
395 other *Firmicutes* proteins corresponding to copy B sequences (from *Clostridium difficile*  
396 YP\_001087362.1 and *S. ruminantium* WP\_014425426.1) (Fig. 1A) were also shown to possess an  
397 arginine decarboxylase activity (Liao *et al.*, 2008, Burrell *et al.*, 2010), which led to a hypothesis  
398 that copy B AAT-fold decarboxylases would be Adcs (Burrell *et al.*, 2010). The function of copy A  
399 awaits further investigation and, to our knowledge, the only study focused on the *yaaO* gene  
400 (copy A) concluded that in *B. subtilis* this protein had no effect on polyamine production  
401 (Sekowska *et al.*, 1998).

402 Regarding the evolutionary history of the wing domain-containing LAOdc, our analysis

403 reveals that proteobacterial LAOdc form two monophyletic groups, Odc and LAdc. Thus, lysine  
404 and arginine decarboxylases appear more closely related to each other than to ornithine  
405 decarboxylases, although the relationships among the two Ldc families (LdcI/C and LdcA) and  
406 the Adc family are not resolved (PP <0.5) (Fig. 3A). Furthermore, we showed that the  
407 proteobacterial biosynthetic OdcC and LdcC emerged from inducible Odc and Ldc (*i.e.* OdcI and  
408 LdcI, respectively) through two independent gene duplication events that occurred in  
409 *Enterobacteriaceae*, after the divergence of *Sodalis*. Given that both duplication events seem to  
410 occur in the same branch of the phylogenetic tree, it is tempting to hypothesize that they are  
411 linked, and that a functional connection between both biosynthetic subgroups may have  
412 existed. The emergence of biosynthetic enzymes from inducible ones may appear contra-  
413 intuitive at the first glance, but may reflect an expansion and a diversification of polyamine  
414 functions in these lineages. This would also explain why *Enterobacteriaceae* possess also a  
415 constitutive pathway of polyamine synthesis through an AR-fold Adc.

416         The exhaustive phylogenetic analysis of AAT-fold decarboxylases discloses multiple cases  
417 of horizontal gene transfers (e.g. within Cluster III, from *Firmicutes* to *Firmicutes* and to  
418 *Actinobacteria* within Cluster I, but also from *Proteobacteria* to *Firmicutes* within cluster II).  
419 Interestingly, the two wing-less AAT-fold LAOdc coding genes found in *L. saerimneri* 30a were  
420 proposed to result from the horizontal gene transfer of an acid stress inducible Odc from  
421 *Enterobacteriaceae*, followed by a gene duplication event (Romano *et al.*, 2013, Romano *et al.*,  
422 2014). One of the two resulting paralogues is thought to have kept the original function  
423 ([WP\\_009553942.1](#)), while the other acquired the capacity to use lysine as substrate  
424 ([EKW98991.1](#)). Instead, our analysis points to a different scenario. In fact, the two copies

425 present in *L. saerimneri* branch in two different parts of the Odcl tree (Fig. S5), meaning that  
426 they have different origins, and result likely from two independent horizontal gene transfer  
427 events of Odcl coding genes, whereupon one of these two acquired genes shifted secondarily  
428 towards the capacity to use lysine instead of ornithine. Interestingly, the lysine decarboxylating  
429 copy is present in various *Lactobacilli*, while the copy using ornithine as substrate is specific to *L.*  
430 *saerimneri* (Fig. S5), suggesting that the former was acquired first. Remarkably, these two  
431 enzymes rely on the same antiporter capable to exchange both ornithine/Put and lysine/Cad  
432 pairs, resulting in a unique three-component decarboxylation system involved in acid stress  
433 response (Romano *et al.*, 2013). This case of substrate specificity shift is probably not an  
434 exception, as exemplified by *Burkholderia* sp. AIU 395 in which an AAT-fold enzyme using lysine  
435 as substrate branches within the Adc cluster in phylogenetic trees (Fig. 3). Beside substrate shift,  
436 existence of dual specificity has been most extensively documented in the case of AR-fold  
437 LOdcs, exemplified by bifunctional enzymes of *S. ruminantium* (Takatsuka *et al.*, 2000) and *V.*  
438 *vulnificus* (Lee *et al.*, 2007). In particular, crystal structures of the *V. vulnificus* enzyme in  
439 complex with either Put or Cad revealed that the dual substrate specificity is based on a bridging  
440 water molecule necessary for the binding of a shorter Put ligand in addition to the longer Cad. A  
441 similar dual substrate specificity mechanism may also exist in the case of the AAT-fold LAOdc  
442 enzymes although it has not been documented up to now.

443         Altogether, our data indicate that functional changes affecting gene regulation, substrate  
444 fixation, and cellular function occurred several times during the evolution of AAT-fold enzymes.  
445 In the light of these observations, one may wonder if the so-called Adc, LdcC, Ldcl, OdcC, and  
446 Odcl clusters defined according to phylogenetic criteria correspond indeed to homogeneous

447 functional groups and thus if phylogenetic criteria/sequence similarity based measures are good  
448 predictors of the function of the AAT-fold enzymes. The very restricted number of  
449 experimentally characterized enzymes calls for caution and for the urgent need for additional  
450 experimental data.

451 One of the main results of the presented phylogenetic analysis is the identification of a  
452 novel large family of decarboxylases, called LdcA, ancestral in *Betaproteobacteria* and in  
453 *Pseudomonadaceae*. Thus, the second part of this work was dedicated to functional  
454 characterization of the LdcA from a major human opportunistic pathogen *P. aeruginosa*.

455 The *ldcA* gene belongs to the core genome of *P. aeruginosa*, comprising at least 4,000  
456 conserved genes (Hilker *et al.*, 2015, Valot *et al.*, 2015). Similarly to *ldcI*, in *P. aeruginosa*,  
457 *Pseudomonas resinovorans*, *Pseudomonas denitrificans* and *Pseudomonas knackmussii*, *ldcA* is  
458 organized in a gene cluster with a gene coding for a homologue of the CadB antiporter,  
459 although *cadB* (*PA1819* in *P. aeruginosa*) appears downstream, and not upstream, of the lysine  
460 decarboxylase-encoding gene. The presence of a dedicated Lys/Cad transporter could be  
461 important from a physiological standpoint because CadB is involved not only in  
462 substrate/product exchange but also in the generation of proton motive force  
463 (Soksawatmaekhin *et al.*, 2004). Remarkably, the proximity of *cadB* and *ldcA* is an exception in  
464 the *ldcA* subfamily (Fig. S2), which does not rule out a hypothesis that LdcA could have another  
465 function in other taxa. The whole of our data suggests that *ldcI* and *P. aeruginosa* LdcA are  
466 different in terms of regulation and function. Indeed, we clearly show that LdcA is not involved  
467 in acid or oxidative stress response, and its expression is triggered by neither of these stresses;  
468 instead it is controlled by ArgR and QS. More similar to LdcC, *P. aeruginosa* LdcA, and certainly

469 the other members of this novel lysine decarboxylase subfamily, are biosynthetic enzymes  
470 responsible for the Cad production by the bacterium.

471 Importantly, LdcA is the only Cad producing enzyme in *P. aeruginosa* PAO1, as  
472 demonstrated by the measurement of the intracellular contents of Cad (Fig. 6). This conclusion  
473 was unexpected considering that the product of another gene, *PA4115*, was previously reported  
474 to be responsible for 25% of Cad production in overnight cultures grown in the same medium as  
475 the one used in our assays, and therefore proposed to be an Ldc (Manuel *et al.*, 2010). After  
476 carboxypenicillin treatment, the *PA4115* mutant exhibited an increased number of persisters  
477 that was significantly reduced upon addition of exogenous Cad, further supporting the  
478 hypothesis of *PA4115* being an Ldc (Manuel *et al.*, 2010). Yet, our careful inspection of its  
479 sequence revealed that *PA4115* belongs to the family of Lonely Guy (LOG) proteins because it  
480 contains a highly conserved PGGxGTxxE motif and a nucleotide-binding Rossmann fold.  
481 Remarkably, LOG proteins were shown to be often mis-annotated as lysine decarboxylase  
482 enzymes, yet without support by biochemical or functional data, whereas they actually possess  
483 a cytokinin-specific phosphoribohydrolase activity (Dzurova *et al.*, 2015, Seo & Kim, 2017) or a  
484 pyrimidine/purine nucleotide 5'-monophosphate nucleosidase activity (Sevin *et al.*, 2017).  
485 Recently, PPnN (or YghD) from *E. coli*, a close homologue sharing 56% identity with *PA4115*, has  
486 been shown to catalyze the hydrolysis of N-glycosidic bond of AMP, GMP, IMP, CMP, dTMP and  
487 UMP to form ribose 5-phosphate and the corresponding free base. Hence, it is quite likely that  
488 *PA4115* catalyzes the same reaction and plays a role in maintaining the nucleotide pool  
489 homeostasis by degrading excess nucleotides in *P. aeruginosa* (Sevin *et al.*, 2017). Therefore,  
490 the reduced production of Cad in *PA4115* mutant needs to be confirmed because the

491 relationship between PA4115 and LdcA activity is not clear and could involve indirect causes.

492         The persistence phenotype observed in *ldcA* mutants is consistent with the beneficial  
493 effect of LdcA on growth fitness. Indeed, recent research on bacterial persistence uncovered  
494 intracellular ATP concentrations as being one of the major factors affecting the amount of  
495 persister cells, and demonstrated that ATP levels are sufficient to predict bacterial tolerance to  
496 antibiotics (Conlon *et al.*, 2016, Shan *et al.*, 2017). Considering that Cad produced by LdcA is  
497 metabolized and used up by the Krebs cycle to create ATP and that the activity of the lysine/Cad  
498 antiporter generates proton motive force essential for ATP synthesis (Soksawatmaekhin *et al.*,  
499 2004), one would expect that in *P. aeruginosa* the *ldcA* mutation may lead to a decrease in ATP  
500 levels, which in turn would result in an increase of persisters' population. This hypothesis could  
501 be challenged by blocking the Cad degradation pathway or the CadB antiporter activity.

502         The capacity of Put and Spd to complement the growth phenotype of the *ldcA* mutant  
503 and boost *P. aeruginosa* cultures in minimal medium suggests that in *P. aeruginosa* the three  
504 major polyamines share certain properties. In the same lines, Cad was shown to substitute for  
505 Put and Spd as growth factors in *E. coli* cells depleted of these two polyamines (Igarashi *et al.*,  
506 1986). The growth phenotype described in our work is observed under specific growth  
507 conditions. It reveals the importance of Cad when growing *P. aeruginosa* in minimal medium  
508 and highlights a certain redundancy in the function of polyamines. It remains to be investigated  
509 whether the phenotype is linked to a regulatory effect of Cad or to its anabolism. Recent  
510 literature about *Eikenella corrodens* has pointed out the importance of an AAT-fold Ldc  
511 (belonging to Ldcl group) as a virulence factor against eukaryotic cells that acts through  
512 depletion of essential lysine (Lohinai *et al.*, 2015). Therefore the potential role of LdcA in the

513 virulence of *P. aeruginosa* may warrant further investigation. In the present study, we observed  
514 that the absence of the enzyme did not affect T3SS-dependent cytotoxicity or the mobility  
515 relying on flagellum and Type IV pili (not shown). However, it would also be relevant to probe  
516 the importance of LdcA during mouse infection, where the proper functioning of *P. aeruginosa*  
517 metabolism is primordial for virulence.

518 Our study reveals that the *ldcA* gene is relatively ancient in *Proteobacteria*, being  
519 ancestral in *Betaproteobacteria* and in *Pseudomonadaceae*, two taxa that cover a wide range of  
520 ecological niches. Information about regulation and function of an enzyme of the previously  
521 unknown LdcA subfamily enables a step further towards understanding of the evolution and the  
522 importance of Cad metabolism in bacteria.

523

## 524 **Experimental procedures**

525

### 526 *Phylogeny: Dataset assembly*

527 Functionally characterized sequences of AAT-fold LAODcs were retrieved from NCBI: LdcI  
528 (NP\_418555.1), LdcC (NP\_414728.1), Adc (NP\_418541.1), OdcC (NP\_417440.1), and Odcl  
529 (NP\_415220.1) from *E. coli* str. K-12 substr., MG1655 and LdcA (NP\_250509.1) from *P.*  
530 *aeruginosa* PAO1. These sequences were used as seeds to query a local database containing  
531 4,466 complete proteomes of prokaryotes downloaded from the NCBI  
532 (<ftp://ftp.ncbi.nlm.nih.gov>) with the BLASTP 2.2.6 software (Altschul *et al.*, 1997) using default  
533 parameters. Homologues of LAODc were retrieved and aligned using MAFFT v7 (Kato &  
534 Standley, 2013). The resulting multiple alignment was used to build a HMM profile with the



535 HMMbuild program from the HMMER v3.1b1 package (McClure MA, 1996). This profile was  
536 then used to query the local database of complete proteomes with the HMMsearch program.  
537 Sequences with e-values lower than  $2.2e-13$  were retrieved. Finally, the search for potential  
538 unannotated sequences was performed using TBLASTN 2.2.6 on genomic sequences  
539 corresponding to the 4,466 complete proteomes. This led to the identification of 4,090  
540 homologous sequences.

541

#### 542 *Phylogeny: Phylogenetic inference*

543 To limit taxonomic redundancy for phylogenetic analyses, a sampling of the retrieved sequences  
544 by selecting randomly one strain per species has been performed. Multiple alignments were  
545 built with MAFFT using the L-INS-i option that allows the construction of accurate multiple  
546 alignments and trimmed with BMGE v1.1 with matrix substitution BLOSUM30 (Criscuolo &  
547 Gribaldo, 2010).

548 Maximum likelihood trees were inferred with PhyML 3.1 (Guindon *et al.*, 2010). The best suited  
549 evolutionary models were selected using the model test tool implemented in IQ-TREE v1.4.1  
550 according to the Bayesian information criterion (BIC) (Nguyen *et al.*, 2015). The robustness of  
551 the inferred trees was assessed using the non-parametric bootstrap procedure implemented in  
552 PhyML (100 replicates of the original datasets). Bayesian trees were inferred using MrBayes  
553 v3.2.6 (Ronquist & Huelsenbeck, 2003). Two runs were launched with four chains for each run  
554 (50,000 iterations). The first 25% of the trees were discarded as burn-in and chain convergence  
555 has been checked by analysing the evolution of the Ln(L) curve and checking the average  
556 standard deviation of split frequencies values. Figures of trees have been generated using

557 EvolView (He *et al.*, 2016) (<http://nar.oxfordjournals.org/content/44/W1/W236>) and iTOL  
558 (Letunic & Bork, 2016). Genomic context figures have been generated using GeneSpy  
559 (<https://lbbe.univ-lyon1.fr/GeneSpy/>) developed by P.S. Garcia.  
560 Reference phylogenies of *Firmicutes*, *Cyanobacteria*, *Proteobacteria*, and Enterobacteriaceae  
561 strains contained in our local database were inferred using ribosomal proteins as suggested  
562 elsewhere (Ramulu *et al.*, 2014). The reference tree of *Firmicutes* has been rooted according to  
563 a recent study (Antunes *et al.*, 2016). The reference tree of *Cyanobacteria* has been rooted by  
564 including ribosomal protein sequences from *Natranaerobius thermophilus* (*Firmicutes*) and  
565 *Streptomyces albulus* (*Actinobacteria*). The reference tree of *Proteobacteria* has been rooted  
566 according to Gupta (Gupta, 2000). Finally, the reference phylogeny of *Enterobacteriaceae* has  
567 been rooted using with *Shewanella baltica* (*Alteromonadales*) and *Pasteurella multocida*  
568 (*Pasteurellales*) ribosomal protein sequences.

569 For each analysis, the ribosomal protein sequences were identified using the RiboDB  
570 database engine (Jauffrit *et al.*, 2016) and aligned with MAFFT using the L-INS-i option. The  
571 resulting multiple alignments were trimmed as described above and combined to build a large  
572 supermatrix that was used to build maximum likelihood phylogenetic trees.

573  
574 *Bacterial strains, plasmids, and growth conditions*  
575 The bacterial strains and plasmids used in this study are listed in Table S1 in the supplemental  
576 material. Bacteria were cultivated aerobically at 37°C in rich Lysogeny Broth (LB) medium, in  
577 Mueller Hinton II (Becton Dickinson) or in minimal medium P (30mM Na<sub>2</sub>HPO<sub>4</sub>, 14 mM KH<sub>2</sub>PO<sub>4</sub>,  
578 20mM (NH<sub>4</sub>)<sub>2</sub>SO<sub>4</sub>, 1 mM MgSO<sub>4</sub>, 4μM FeSO<sub>4</sub>, 0.4 μM Pyridoxal-5'-phosphate, pH 7.4) (Haas *et*

579 *al.*, 1977) containing the indicated carbon and nitrogen sources. *P. aeruginosa* was also cultured  
580 on Pseudomonas Isolation Agar plates (PIA; Difco). When required, antibiotics were added at  
581 the following concentrations (in  $\mu\text{g/ml}$ ): 100 (ampicillin), 25 (gentamycin), 25 (kanamycin) and  
582 10 (tetracycline) for *E. coli*, 200 (carbenicillin), 200 (gentamycin) and 200 (tetracycline) for *P.*  
583 *aeruginosa*.

584

#### 585 *Genetic manipulations*

586 To delete *ldcA* gene, fused upstream and downstream flanking regions of the gene were  
587 generated by “Splicing by Overlap Extension” (SOE)-PCR using PAO1 genomic DNA as matrix and  
588 appropriate primer pairs. The resulting fragment of 819 bp was cloned into pCR-Blunt II-TOPO  
589 vector, sequenced and then subcloned into *Bam*HI-*Hind*III sites of pEXG2, leading to  
590 pEXG2 $\Delta$ *ldcA*. The suicide plasmid carries the counter-selectable *sacB* marker from *B. subtilis*  
591 which confers sensitivity to sucrose. The plasmid was mobilized into *P. aeruginosa* strain by  
592 triparental mating, using the conjugative properties of the helper plasmid pRK2013. Co-  
593 integration events were selected on PIA plates containing gentamycin. Single colonies were then  
594 plated on PIA medium containing 5% (w/v) sucrose to select for the loss of plasmid: the  
595 resulting sucrose-resistant strains were checked for antibiotic sensitivity and for *ldcA* (wild-type  
596 or truncated gene) genotype by PCR.

597 To complement the *ldcA* mutant, a 2785 bp-long fragment encompassing the coding  
598 sequence and 495 bases upstream the ATG was PCR amplified from PAO1 genomic DNA using  
599 appropriate primer pairs. The PCR product was cloned into pCR-Blunt II-TOPO and sequenced.  
600 The *Spe*I restriction fragment was subcloned in mini-CTX1 cut with the same enzyme, leading to

601 miniCTX-*ldcA*. A mini-CTX derivative was used to construct a *lacZ* reporter vector. PCR  
602 amplification was used to produce the 548 bp-long *ldcA* promoter fragment (-498/+44 relative  
603 to translation initiation) with appropriate primers. After ligation into pCR-Blunt II-TOPO vector  
604 and sequencing, the fragment was sub-cloned into the *XhoI-EcoRI* sites of mini-CTX-*lacZ*. Both  
605 miniCTX-*ldcA* and mini-CTX-*PldcA-lacZ* were introduced into *P. aeruginosa* by triparental  
606 conjugation and the transconjugants were selected on PIA plates containing tetracycline. The  
607 pFLP2 plasmid was then used to excise the FRT cassette as described (Hoang *et al.*, 1998).

608 Plasmids and primers used in PCR are listed in the Tables S1 and S2, respectively.

609

#### 610 *β-Galactosidase assays*

611 Bacteria were grown aerobically at 37°C in 100 ml flasks with agitation (300 rpm). At the  
612 indicated OD,  $\beta$ -galactosidase activity was assayed as described (Miller, 1972), with details  
613 reported in (Thibault *et al.*, 2009).

614

#### 615 *Intracellular metabolite analysis*

616 Strains were first isolated from an overnight solid culture at 37°C on Mueller Hinton II agar 1.5%.  
617 Precultures and cultures were performed on a Minitron II rotary shaker at 220 rpm (Infors HT)  
618 under aerobic conditions (10% of total volume of Erlenmeyer flask). A few bacterial colonies  
619 from the agar plate were precultured overnight at 37°C and an aliquot was withdrawn and  
620 diluted to an OD<sub>600</sub> of ~0.1 in a fresh culture medium for the culture step. Growth curves were  
621 determined for each strain and used to determine their respective concentration (CFU/ml) and  
622 the OD at which the bacteria should be harvested to correspond to early-, mid-, and late-

623 exponential phases.

624           The protocol of the intracellular metabolites sampling was adapted from a previously  
625 described procedure (Aros-Calt *et al.*, 2015). In brief, a 5 ml aliquot of cell culture broth was  
626 taken from the main culture and was filtered in a few seconds using poly(ether sulfone) sterile  
627 membrane disc filters (Supor450, 0.45  $\mu\text{m}$  pore size, PALL) mounted on a Millipore filtration  
628 device (Darmstadt). The bacteria on the filter were quickly washed with 5 ml of 0.6% NaCl  
629 solution maintained at room temperature. The filter was then rapidly transferred to a 50 ml  
630 Falcon tube containing 5 ml of cold 60% ethanol (v/v,  $\leq -20^{\circ}\text{C}$ ). The Falcon tube was  
631 subsequently quickly immersed in liquid nitrogen. Following this quenching step, tubes  
632 containing bacteria on filters in the extraction solution were vortexed 10 times on ice to remove  
633 the cells from the filter. Then, a 1 ml aliquot of the cell suspension was transferred to 2 ml tubes  
634 containing 0.1 mm glass beads (Bertin Technologies). Cell disruption was performed by three  
635 cycles in a Precellys 24 homogenizer (Bertin Technologies) for 30 s at 3,800 rpm at  $\sim 4^{\circ}\text{C}$ . The  
636 glass beads and cell debris were separated from the supernatant by centrifugation for 5 min at  
637  $4^{\circ}\text{C}$  and 10,000g. A 400  $\mu\text{L}$  aliquot of the supernatant was withdrawn and further vacuum-dried  
638 using a SpeedVac instrument (Thermo Fisher Scientific) and stored at  $-80^{\circ}\text{C}$  until analysis. Dried  
639 extracts were dissolved in an adjusted volume of 95% mobile phase A / 5% mobile phase B to  
640 obtain the equivalent of  $1.25 \cdot 10^7$  CFU in 15  $\mu\text{l}$  before analysis by LC/HR-MS.

641 To detect intracellular metabolites, LC/HR-MS experiments were performed using a Dionex  
642 Ultimate chromatographic system (Thermo Fisher Scientific) coupled to an Exactive (Orbitrap)  
643 mass spectrometer from Thermo Fisher Scientific fitted with an electrospray source. The mass  
644 spectrometer was externally calibrated before each analysis using the manufacturer's

645 predefined methods and recommended calibration mixture provided by the manufacturer.  
646 Chromatographic separation was performed on a Discovery HS F5 PFPP 5  $\mu\text{m}$ , 2.1  $\times$  250 mm  
647 column (Sigma) at 30°C. The chromatographic system was equipped with an on-line pre-filter  
648 (Thermo Fisher Scientific). Mobile phases were 100% water (A) and 100% ACN (B), both of  
649 which containing 0.1% formic acid. Chromatographic elution was achieved with a flow rate of  
650 250  $\mu\text{l}/\text{min}$ . After injection 15  $\mu\text{l}$  of sample, elution started with an isocratic step of 2 min at 5%  
651 phase B, followed by a linear gradient from 5 to 100% of phase B in 18 min. These proportions  
652 were kept constant for 4 min before returning to 5% of phase B and letting the system  
653 equilibrate for 6 min. The column effluent was directly introduced into the electrospray source  
654 of the mass spectrometer, and analyses were performed in the positive ion mode. Source  
655 parameters were as follows: capillary voltage set at 5 kV; capillary temperature at 300°C; sheath  
656 and auxiliary gas (nitrogen) flow rates at 50 and 25 arbitrary units, respectively; mass resolution  
657 power of the analyzer set at 50,000 at  $m/z$  200 (full width at half maximum, FWHM) for singly  
658 charged ions. The acquisition was achieved from  $m/z$  50 to 250 in the positive ionization mode  
659 during the first 12 min of the run. Under these conditions were achieved a good separation and  
660 detection (with an average mass accuracy better than 3ppm) of the targeted molecules (under  
661 their  $[\text{M}+\text{H}]^+$  form). These species were readily identified in the extracts through the use of the  
662 corresponding commercial molecules obtained from Sigma-Aldrich. Extracted ion  
663 chromatograms were generated and resulting peaks integrated using the Xcalibur software  
664 (version 2.1, Thermo Fisher Scientific) for Spd ( $[\text{M}+\text{H}]^+$  at theoretical  $m/z$  146.1652, retention  
665 time 5.24 min), Put ( $m/z$  89.1073, 3.63 min) and Cad ( $m/z$  103.1230, 3.94 min).  
666

667 **Acknowledgments:** We thank Rémi Peyraud and Ina Attrée for helpful discussions. This work  
668 has received funding from GRAL (ANR-10-LABX-49-01), the European Union's Horizon 2020  
669 research and innovation programme under grant agreement No 647784, and the ANR-16-CE02-  
670 0005. This work was also supported by CEA and the French Ministry of Research and National  
671 Research Agency as part of the French metabolomics and fluxomics infrastructure (MetaboHUB,  
672 ANR-11-INBS-0010 grant). Diego Carriel was supported by a PhD grant from LABEX GRAL and  
673 Pierre S. Garcia was supported by a grant from the ARC Santé from the Region Auvergne Rhône-  
674 Alpes.

675  
676 **Author contributions:** DCL, PSG, FC, and PL performed experiments. All authors analyzed data.  
677 IG, SE and CBA designed and supervised the overall study and wrote the paper with contribution  
678 from all authors.

679  
680 **Abbreviated Summary**  
681 Bacterial polyamines are involved in many fundamental processes and are mainly synthesized by  
682 dedicated lysine, arginine and ornithine decarboxylases or LAOdcS. Our exhaustive phylogenetic  
683 analysis reveals evolutionary history of LAOdcS and discloses a hitherto overlooked LdcA  
684 subfamily. We show that LdcA is playing an important role in growth and persistence of the  
685 major multidrug resistant human pathogen *P. aeruginosa*, exerted through cadaverine  
686 biosynthesis and concomitant regulation of intracellular levels of putrescine and spermidine.

687  
688 **Figure legends**

689

690 **FIG 1.** LAOdc are ancestral in *Firmicutes*.

691 (A) Unrooted maximum likelihood phylogeny of LAOdc Cluster I (PhyML, LG+I+G4, 504  
692 sequences, 295 amino-acid positions), displayed as a cladogram. The corresponding phylogram  
693 is available at the newick format as supplementary data. Leave colors correspond to taxonomic  
694 groups (*Firmicutes*: red, *Cyanobacteria*: green, *Actinobacteria*: yellow, other: grey). External  
695 colored rings correspond to copy A (blue) and B (pink). LAOdc sequences discussed in the text or  
696 for which functional information is available are indicated with gray arrows. Red dots  
697 correspond to bootstrap values (BV). The size of the dots is proportional to BV.

698 (B) Taxonomic distribution of AAT-fold LAOdc according to a reference maximum likelihood  
699 phylogeny of *Firmicutes*, displayed as a cladogram. The corresponding phylogram is available at  
700 the newick format as supplementary data. The reference tree was inferred using ribosomal  
701 protein sequences (PhyML, LG+I+G4, 38 sequences, 6,133 amino-acid positions) and rooted  
702 according to a recent study by Antunes *et al.* (Antunes *et al.*, 2016) Red dots correspond to  
703 bootstrap values (BV). The size of the dots is proportional to BV. The blue diamonds pinpoint  
704 the emergence of copy A and copy B. Rectangles at leaves indicate that at least one genome of  
705 the considered taxon encodes one or more AAT-fold LAOdc. More precisely a green rectangle  
706 indicates that the ancestor of the taxon likely contains one (or more) AAT-fold LAOdc gene,  
707 while a red rectangle indicates that some members of the taxon acquired secondarily their AAT-  
708 fold LAOdc by horizontal gene transfer.

709 (C) Genomic context of LAOdc A and B in a sample of *Firmicutes*. Black arrows: LAOdc coding  
710 genes, colored arrows: conserved neighbor genes.



711

712 **FIG 2.** LAOdc are ancestral in *Cyanobacteria*.

713 (A) Maximum likelihood phylogeny of LAOdc of *Cyanobacteria* (PhyML, LG+I+G4, 28 sequences,  
714 446 amino-acid positions), displayed as a cladogram. The corresponding phylogram is available  
715 at the newick format as supplementary data. The tree has been rooted according to the  
716 reference phylogeny of *Cyanobacteria* (see above). Leave colors correspond to taxonomic  
717 groups. Red dots correspond to bootstrap values (BV). The size of the dots is proportional to BV.

718 (B) Taxonomic distribution of AAT-fold LAOdc according to a reference maximum likelihood  
719 phylogeny of *Cyanobacteria*, displayed as a cladogram. The corresponding phylogram is  
720 available at the newick format as supplementary data. The reference tree was inferred using  
721 ribosomal protein sequences (PhyML, LG+I+G4, 30 sequences, 6,394 amino acid positions). The  
722 tree has been rooted using sequences from *Firmicutes* (*Natranaerobius thermophilus*) and  
723 *Actinobacteria* (*Streptomyces albulus*). Red dots correspond to bootstrap values (BV). The size of  
724 the dots is proportional to BV. The blue diamond pinpoints the origin of AAT-fold LAOdc in  
725 *Cyanobacteria*. Rectangles at leaves indicate that at least one genome of the considered taxon  
726 encodes one or more AAT-fold LAOdc. More precisely a green rectangle indicates that the  
727 ancestor of the taxon likely contains one (or more) AAT-fold LAOdc gene.

728 (C) Genomic context of LAOdc in a sample of *Cyanobacteria*. Black arrows: LAOdc genes.

729

730 **Fig. 3.** Phylogeny of the LAOdc Cluster II

731 (A) Bayesian phylogeny of cluster II inferred from a sample of representative sequences and  
732 rooted with a sample of sequences from clusters I and III (MrBayes, mixed model+G4, 54

733 sequences, 392 amino acid positions). The scale bar represents the average number of  
734 substitutions per site. Numbers at branches correspond to posterior probabilities. The ML tree  
735 inferred with the same dataset supported the same topology (see supplementary data).  
736 (B) Maximum likelihood phylogeny of the LAOdc Cluster II (PhyML, LG+I+G4, 551 sequences, 589  
737 amino-acid positions), displayed as a cladogram. The corresponding phylogram is available at  
738 the newick format as supplementary data. LAOdc sequences from *E. coli* and *P. aeruginosa*  
739 discussed in the text are indicated with gray arrows. The tree has been rooted according to (A).  
740 Colors on the external circle correspond to taxonomic groups: dark blue: *Proteobacteria*, red:  
741 *Firmicutes*, yellow: *Actinobacteria*, gray: other taxa. Red dots correspond to bootstrap values  
742 (BV). The size of the dots is proportional to BV.

743

744 **Fig. 4.** Taxonomic distribution of LAOdc in *Proteobacteria*

745 (A) Taxonomic distribution of AAT-fold LAOdc according to a reference maximum likelihood  
746 phylogeny of *Proteobacteria*, displayed as a cladogram. The corresponding phylogram is  
747 available at the newick format as supplementary data. The reference tree was inferred using  
748 ribosomal protein sequences (PhyML, LG+I+G4, 108 sequences, 6,129 amino acid positions). The  
749 tree has been rooted in the branch separating *Deltaproteobacteria* and *Epsilonproteobacteria* in  
750 agreement with the study by Gupta (Gupta, 2000). Leaf colors correspond to taxonomic  
751 groups. Red dots correspond to bootstrap values (BV). The size of the dots is proportional to BV.  
752 A blue diamond indicates the ancestral presence of LAOdc families in the corresponding taxon.  
753 Rectangles at leaves indicate that at least one genome of the considered taxon encodes one or  
754 more AAT-fold LAOdc. More precisely a green rectangle indicates that the ancestor of the taxon

755 likely contains one (or more) AAT-fold LAOdc gene, while a red rectangle indicates that some  
756 members of the taxon acquired secondarily their AAT-fold LAOdc by horizontal gene transfer.

757 (B) Taxonomic distribution of AAT-fold LAOdc according to a reference maximum likelihood  
758 phylogeny of *Enterobacteraceae*, displayed as a cladogram. The corresponding phylogram is  
759 available at the newick format as supplementary data. The reference tree was inferred using  
760 ribosomal protein sequences (PhyML, LG+I+G4, 34 sequences, 6,333 amino acid positions). The  
761 tree was rooted with *Shewanella baltica* (*Alteromonadales*) and *Pasteurella multocida*  
762 (*Pasteurellales*). Leaf colors correspond to taxonomic groups. Other legend elements are  
763 identical to (A).

764

765 **Fig. 5.** Factors influencing *ldcA* expression

766 Activity of *ldcA* promoter fused to *lacZ* reporter gene was assessed during growth in different  
767 media and genetic backgrounds. Measurements of the  $\beta$ -galactosidase activity of PAO1::*PldcA*-  
768 *lacZ* strain grown either in minimal medium P (MMP) containing 20 mM L-glutamate and 20 mM  
769 arginine (A), or in LB containing or not 20 mM arginine (B) were performed at times indicated.

770 C.  $\beta$ -galactosidase activity of wild-type and indicated mutant CHA strains harboring the *PldcA*-  
771 *lacZ* fusion and grown in LB.  $\beta$ -galactosidase activity is expressed in Miller Units (left Y-axis) and  
772 presented in the bar graphs. Growth was performed in 125 ml flasks, followed by measure of  
773 OD<sub>600</sub> (right Y-axis) and plotted on lines. Results are the average of values from three  
774 independent experiments  $\pm$  standard deviation (SD).

775

776 **Fig. 6.** Intracellular Cad in rich medium is produced by the lysine decarboxylase LdcA

777 A. Growth curves of the wild-type strain, the *ldcA* mutant and the complemented strain in the  
778 rich Mueller Hinton medium.

779 B. Intracellular concentration, expressed in area of chromatogram peak, of the three indicated  
780 polyamines at (1) early-, (2) mid- and (3) late-exponential growth phases as indicated.

781  
782 **Fig. 7.** Polyamines are important for growth fitness in minimal medium

783 Growth of the wild-type PAO1 strain, the *ldcA* mutant and the complemented strain in minimal  
784 MMP medium supplemented with 20 mM glutamate, 1mM arginine and 5 mM of (A) lysine, (B)  
785 Cad, (C) Put or (D) Spd in 96-well plates. The experiments are representative of two  
786 experiments.

787  
788

## 789 **Supporting informations**

### 790 **Supplemental material and methods**

791 **Fig. S1.** AAT-fold LAOdc are widespread in *Bacteria*

792 (A) Taxonomic distribution of AAT-fold LAOdc in prokaryotes. For each phylum and class, ratio  
793 corresponds to the number of proteomes containing at least one homologue on the number of  
794 proteomes present in our database. Taxa represented by at least 10 proteomes, among which  
795 more than 20% contained at least one AAT-fold LAOdc homologue are highlighted by colors.

796 (B) Unrooted ML tree of AAT-fold LAOdc (PhyML, LG+I+G4, 1,117 sequences, 273 amino-acid  
797 positions). The tree can be divided in three parts: Cluster I corresponds to wing-less LAOdc  
798 mainly from *Firmicutes*, *Actinobacteria* and *Cyanobacteria*; Cluster II encompasses wing domain

799 containing LAOdc mainly from *Proteobacteria*, while Cluster III gathers wing-less and wing  
800 domain-containing LAOdc from various and unrelated taxa. The scale bar represents the  
801 number of substitutions per site. Bootstrap values (BV) associated to branches separating the  
802 three clusters are indicated.

803

804 **Fig. S2.** Genomic context of LAOdc genes from Cluster II

805 Genomic context of LdcC, Ldcl, OdcC, Odcl, Adc, and Ladc coding genes in a sample of  
806 *Proteobacteria*. Black arrows: LAOdc coding genes, colored arrows: conserved neighbor genes.

807

808 **FIG S3** Influence of stress on *ldcA* expression and growth fitness of *P. aeruginosa*. (A) Effect of  
809 acid and oxidative stress during growth in rich medium. At  $T_0$ , HCl was added to shift the pH of  
810 LB medium from neutral to pH 5 while  $H_2O_2$  was added to a final entration of 1mM.  $\beta$ -  
811 galactosidase activity of PAO1::*PldcA-lacZ* strain was measured at  $T_0$ , then monitored 30 and 60  
812 min after treatment. B) Growth of PAO1 in minimal medium at different pHs was evaluated  
813 using Biolog high-throughput system. Each point corresponds to the “Area Under the Curve”  
814 (AUC) measured after 24h of bacterial growth.

815

816 **FIG S4** LdcA function affects carbenicillin persistence. Percentage of survivors in rich medium  
817 (cation-adjusted Mueller Hinton Broth) after 24h of carbenicillin treatment. Growth was  
818 performed in erlenmeyer flasks at 37°C with agitation (300 RPM). Percentage of survivors was  
819 calculated from CFU counting after 24h of antibiotic treatment at 500 $\mu$ g/ml (8X MIC).

820

821 **FIG. S5** Maximum likelihood tree of Odcl/OdcC sequences (in blue) (PhyML, LG+I+G4, 514  
822 sequences, 583 amino-acid positions), disclosing the proteobacterial origin of the Odcl  
823 sequences reported by previous studies in a few firmicutes (in dark red) (Romano *et al.*, 2013,  
824 Romano *et al.*, 2014). These sequences were likely acquired through at least three horizontal  
825 gene transfers indicated by dark yellow branches. The tree was rooted with Adc (orange  
826 triangle), LdcA (green triangle), and Ldcl/C (blue triangle) sequences. The pink triangle  
827 correspond to OdcC sequences. Numbers at branches correspond to aLRT supports. The scale  
828 bar indicates the average number of substitutions per site.

829

830 **Table S1** List of bacterial strains and plasmids used in this work.

831 **Table S2** Primers used in this study.

832

833

## 834 REFERENCES

835

- 836 Altschul, S.F., T.L. Madden, A.A. Schaffer, J. Zhang, Z. Zhang, W. Miller & D.J. Lipman,  
837 (1997) Gapped BLAST and PSI-BLAST: a new generation of protein database search  
838 programs. *Nucleic Acids Res* **25**: 3389-3402.
- 839 Antunes, L.C., D. Poppleton, A. Klingl, A. Criscuolo, B. Dupuy, C. Brochier-Armanet, C. Beloin  
840 & S. Gribaldo, (2016) Phylogenomic analysis supports the ancestral presence of LPS-  
841 outer membranes in the Firmicutes. *Elife* **5**.
- 842 Aros-Calt, S., B.H. Muller, S. Boudah, C. Ducruix, G. Gervasi, C. Junot & F. Fenaille, (2015)  
843 Annotation of the *Staphylococcus aureus* Metabolome Using Liquid Chromatography  
844 Coupled to High-Resolution Mass Spectrometry and Application to the Study of  
845 Methicillin Resistance. *J Proteome Res* **14**: 4863-4875.
- 846 Bodey, G.P., R. Bolivar, V. Fainstein & L. Jadeja, (1983) Infections caused by *Pseudomonas*  
847 *aeruginosa*. *Rev Infect Dis* **5**: 279-313.
- 848 Bunsupa, S., K. Katayama, E. Ikeura, A. Oikawa, K. Toyooka, K. Saito & M. Yamazaki, (2012)  
849 Lysine decarboxylase catalyzes the first step of quinolizidine alkaloid biosynthesis and  
850 coevolved with alkaloid production in leguminosae. *Plant Cell* **24**: 1202-1216.

- 851 Burrell, M., C.C. Hanfrey, L.N. Kinch, K.A. Elliott & A.J. Michael, (2012) Evolution of a novel  
852 lysine decarboxylase in siderophore biosynthesis. *Mol Microbiol* **86**: 485-499.
- 853 Burrell, M., C.C. Hanfrey, E.J. Murray, N.R. Stanley-Wall & A.J. Michael, (2010) Evolution and  
854 multiplicity of arginine decarboxylases in polyamine biosynthesis and essential role in  
855 *Bacillus subtilis* biofilm formation. *J Biol Chem* **285**: 39224-39238.
- 856 Chou, H.T., M. Hegazy & C.D. Lu, (2010) L-lysine catabolism is controlled by L-arginine and  
857 ArgR in *Pseudomonas aeruginosa* PAO1. *J Bacteriol* **192**: 5874-5880.
- 858 Conlon, B.P., S.E. Rowe, A.B. Gandt, A.S. Nuxoll, N.P. Donegan, E.A. Zalis, G. Clair, J.N.  
859 Adkins, A.L. Cheung & K. Lewis, (2016) Persister formation in *Staphylococcus aureus* is  
860 associated with ATP depletion. *Nat Microbiol* **1**: 16051.
- 861 Criscuolo, A. & S. Gribaldo, (2010) BMGE (Block Mapping and Gathering with Entropy): a new  
862 software for selection of phylogenetic informative regions from multiple sequence  
863 alignments. *BMC Evol Biol* **10**: 210.
- 864 Dela Vega, A.L. & A.H. Delcour, (1996) Polyamines decrease *Escherichia coli* outer membrane  
865 permeability. *J Bacteriol* **178**: 3715-3721.
- 866 Di Martino, M.L., R. Campilongo, M. Casalino, G. Micheli, B. Colonna & G. Prosseda, (2013)  
867 Polyamines: emerging players in bacteria-host interactions. *Int J Med Microbiol* **303**: 484-  
868 491.
- 869 Dzurova, L., F. Forneris, S. Savino, P. Galuszka, J. Vrabka & I. Frebort, (2015) The three-  
870 dimensional structure of "Lonely Guy" from *Claviceps purpurea* provides insights into the  
871 phosphoribohydrolase function of Rossmann fold-containing lysine decarboxylase-like  
872 proteins. *Proteins* **83**: 1539-1546.
- 873 El Bakkouri, M., I. Gutsche, U. Kanjee, B. Zhao, M. Yu, G. Goret, G. Schoehn, W.P. Burmeister  
874 & W.A. Houry, (2010) Structure of RavA MoxR AAA+ protein reveals the design  
875 principles of a molecular cage modulating the inducible lysine decarboxylase activity.  
876 *Proc Natl Acad Sci U S A* **107**: 22499-22504.
- 877 Eliot, A.C. & J.F. Kirsch, (2004) Pyridoxal phosphate enzymes: mechanistic, structural, and  
878 evolutionary considerations. *Annu Rev Biochem* **73**: 383-415.
- 879 Fothergill, J.C. & J.R. Guest, (1977) Catabolism of L-lysine by *Pseudomonas aeruginosa*. *J Gen*  
880 *Microbiol* **99**: 139-155.
- 881 Fritz, G., C. Koller, K. Burdack, L. Tetsch, I. Haneburger, K. Jung & U. Gerland, (2009)  
882 Induction kinetics of a conditional pH stress response system in *Escherichia coli*. *J Mol*  
883 *Biol* **393**: 272-286.
- 884 Gale, E.F. & H.M. Epps, (1944) Studies on bacterial amino-acid decarboxylases: 1. l(+)-lysine  
885 decarboxylase. *Biochem J* **38**: 232-242.
- 886 Gale, E.F. & W.E. Van Heyningen, (1942) The effect of the pH and the presence of glucose  
887 during growth on the production of alpha and theta toxins and hyaluronidase by  
888 *Clostridium welchii*. *Biochem J* **36**: 624-630.
- 889 Gellatly, S.L. & R.E. Hancock, (2013) *Pseudomonas aeruginosa*: new insights into pathogenesis  
890 and host defenses. *Pathog Dis* **67**: 159-173.
- 891 Guindon, S., J.F. Dufayard, V. Lefort, M. Anisimova, W. Hordijk & O. Gascuel, (2010) New  
892 algorithms and methods to estimate maximum-likelihood phylogenies: assessing the  
893 performance of PhyML 3.0. *Syst Biol* **59**: 307-321.
- 894 Gupta, R.S., (2000) The phylogeny of proteobacteria: relationships to other eubacterial phyla and  
895 eukaryotes. *FEMS Microbiol Rev* **24**: 367-402.
- 896 Haas, D., B.W. Holloway, A. Schambeck & T. Leisinger, (1977) The genetic organization of  
897 arginine biosynthesis in *Pseudomonas aeruginosa*. *Mol Gen Genet* **154**: 7-22.

- 898 He, Z., H. Zhang, S. Gao, M.J. Lercher, W.H. Chen & S. Hu, (2016) Evolview v2: an online  
899 visualization and management tool for customized and annotated phylogenetic trees.  
900 *Nucleic Acids Res* **44**: W236-241.
- 901 Hilker, R., A. Munder, J. Klockgether, P.M. Losada, P. Chouvarine, N. Cramer, C.F. Davenport,  
902 S. Dethlefsen, S. Fischer, H. Peng, T. Schonfelder, O. Turk, L. Wiehlmann, F. Wolbeling,  
903 E. Gulbins, A. Goesmann & B. Tummler, (2015) Interclonal gradient of virulence in the  
904 *Pseudomonas aeruginosa* pangenome from disease and environment. *Environ Microbiol*  
905 **17**: 29-46.
- 906 Hoang, T.T., R.R. Karkhoff-Schweizer, A.J. Kutchma & H.P. Schweizer, (1998) A broad-host-  
907 range Flp-FRT recombination system for site-specific excision of chromosomally-located  
908 DNA sequences: application for isolation of unmarked *Pseudomonas aeruginosa* mutants.  
909 *Gene* **212**: 77-86.
- 910 Igarashi, K. & K. Kashiwagi, (2006) Polyamine Modulon in *Escherichia coli*: genes involved in  
911 the stimulation of cell growth by polyamines. *J Biochem* **139**: 11-16.
- 912 Igarashi, K. & K. Kashiwagi, (2015) Modulation of protein synthesis by polyamines. *IUBMB Life*  
913 **67**: 160-169.
- 914 Igarashi, K., K. Kashiwagi, H. Hamasaki, A. Miura, T. Kakegawa, S. Hirose & S. Matsuzaki,  
915 (1986) Formation of a compensatory polyamine by *Escherichia coli* polyamine-requiring  
916 mutants during growth in the absence of polyamines. *J Bacteriol* **166**: 128-134.
- 917 Jauffrit, F., S. Penel, S. Delmotte, C. Rey, D.M. de Vienne, M. Gouy, J.P. Charrier, J.P. Flandrois  
918 & C. Brochier-Armanet, (2016) RiboDB Database: A Comprehensive Resource for  
919 Prokaryotic Systematics. *Mol Biol Evol* **33**: 2170-2172.
- 920 Kamio, Y. & K. Nakamura, (1987) Putrescine and cadaverine are constituents of peptidoglycan  
921 in *Veillonella alcalescens* and *Veillonella parvula*. *J Bacteriol* **169**: 2881-2884.
- 922 Kamio, Y., H. Poso, Y. Terawaki & L. Paulin, (1986) Cadaverine covalently linked to a  
923 peptidoglycan is an essential constituent of the peptidoglycan necessary for the normal  
924 growth in *Selenomonas ruminantium*. *J Biol Chem* **261**: 6585-6589.
- 925 Kandiah, E., D. Carriel, J. Perard, H. Malet, M. Bacia, K. Liu, S.W. Chan, W.A. Houry, S.  
926 Ollagnier de Choudens, S. Elsen & I. Gutsche, (2016) Structural insights into the  
927 *Escherichia coli* lysine decarboxylases and molecular determinants of interaction with the  
928 AAA+ ATPase RavA. *Sci Rep* **6**: 24601.
- 929 Kang, I.H., J.S. Kim, E.J. Kim & J.K. Lee, (2007) Cadaverine protects *Vibrio vulnificus* from  
930 superoxide stress. *J Microbiol Biotechnol* **17**: 176-179.
- 931 Kanjee, U., I. Gutsche, E. Alexopoulos, B. Zhao, M. El Bakkouri, G. Thibault, K. Liu, S.  
932 Ramachandran, J. Snider, E.F. Pai & W.A. Houry, (2011a) Linkage between the bacterial  
933 acid stress and stringent responses: the structure of the inducible lysine decarboxylase.  
934 *EMBO J* **30**: 931-944.
- 935 Kanjee, U., I. Gutsche, S. Ramachandran & W.A. Houry, (2011b) The enzymatic activities of the  
936 *Escherichia coli* basic aliphatic amino acid decarboxylases exhibit a pH zone of  
937 inhibition. *Biochemistry* **50**: 9388-9398.
- 938 Kanjee, U. & W.A. Houry, (2013) Mechanisms of acid resistance in *Escherichia coli*. *Annu Rev*  
939 *Microbiol* **67**: 65-81.
- 940 Karatan, E. & A.J. Michael, (2013) A wider role for polyamines in biofilm formation. *Biotechnol*  
941 *Lett* **35**: 1715-1717.
- 942 Katoh, K. & D.M. Standley, (2013) MAFFT multiple sequence alignment software version 7:  
943 improvements in performance and usability. *Mol Biol Evol* **30**: 772-780.
- 944 Kikuchi, Y., O. Kurahashi, T. Nagano & Y. Kamio, (1998) RpoS-dependent expression of the



- 945 second lysine decarboxylase gene in Escherichia coli. *Biosci Biotechnol Biochem* **62**:  
946 1267-1270.
- 947 Kim, J.S., S.H. Choi & J.K. Lee, (2006) Lysine decarboxylase expression by *Vibrio vulnificus* is  
948 induced by SoxR in response to superoxide stress. *J Bacteriol* **188**: 8586-8592.
- 949 Kim, S.H., Y. Wang, M. Khomutov, A. Khomutov, C. Fuqua & A.J. Michael, (2016) The  
950 Essential Role of Spermidine in Growth of *Agrobacterium tumefaciens* Is Determined by  
951 the 1,3-Diaminopropane Moiety. *ACS Chem Biol* **11**: 491-499.
- 952 Kuper, C. & K. Jung, (2005) CadC-mediated activation of the cadBA promoter in *Escherichia*  
953 coli. *J Mol Microbiol Biotechnol* **10**: 26-39.
- 954 Kwon, D.H. & C.D. Lu, (2006) Polyamines induce resistance to cationic peptide,  
955 aminoglycoside, and quinolone antibiotics in *Pseudomonas aeruginosa* PAO1. *Antimicrob*  
956 *Agents Chemother* **50**: 1615-1622.
- 957 Lee, J., A.J. Michael, D. Martynowski, E.J. Goldsmith & M.A. Phillips, (2007) Phylogenetic  
958 diversity and the structural basis of substrate specificity in the beta/alpha-barrel fold basic  
959 amino acid decarboxylases. *J Biol Chem* **282**: 27115-27125.
- 960 Lee, Y.S. & Y.D. Cho, (2001) Identification of essential active-site residues in ornithine  
961 decarboxylase of *Nicotiana glutinosa* decarboxylating both L-ornithine and L-lysine.  
962 *Biochem J* **360**: 657-665.
- 963 Letunic, I. & P. Bork, (2016) Interactive tree of life (iTOL) v3: an online tool for the display and  
964 annotation of phylogenetic and other trees. *Nucleic Acids Res* **44**: W242-245.
- 965 Liao, S., P. Poonpairaj, K.C. Ko, Y. Takatuska, Y. Yamaguchi, N. Abe, J. Kaneko & Y. Kamio,  
966 (2008) Occurrence of agmatine pathway for putrescine synthesis in *Selenomonas*  
967 ruminatum. *Biosci Biotechnol Biochem* **72**: 445-455.
- 968 Lightfoot, H.L. & J. Hall, (2014) Endogenous polyamine function--the RNA perspective. *Nucleic*  
969 *Acids Res* **42**: 11275-11290.
- 970 Lohinai, Z., B. Keremi, E. Szoko, T. Tabi, C. Szabo, Z. Tulassay, J.C. DiCesare, C.A. Davis,  
971 L.M. Collins & M. Levine, (2015) Biofilm Lysine Decarboxylase, a New Therapeutic  
972 Target for Periodontal Inflammation. *J Periodontol* **86**: 1176-1184.
- 973 Lu, C.D., Z. Yang & W. Li, (2004) Transcriptome analysis of the ArgR regulon in *Pseudomonas*  
974 aeruginosa. *J Bacteriol* **186**: 3855-3861.
- 975 Madhuri Indurthi, S., H.T. Chou & C.D. Lu, (2016) Molecular characterization of lysR-lysXE,  
976 gcdR-gcdHG and amaR-amaAB operons for lysine export and catabolism: a  
977 comprehensive lysine catabolic network in *Pseudomonas aeruginosa* PAO1. *Microbiology*  
978 **162**: 876-888.
- 979 Malet, H., K. Liu, M. El Bakkouri, S.W. Chan, G. Effantin, M. Bacia, W.A. Houry & I. Gutsche,  
980 (2014) Assembly principles of a unique cage formed by hexameric and decameric *E. coli*  
981 proteins. *Elife* **3**: e03653.
- 982 Manuel, J., G.G. Zhanel & T. de Kievit, (2010) Cadaverine suppresses persistence to  
983 carboxypenicillins in *Pseudomonas aeruginosa* PAO1. *Antimicrob Agents Chemother* **54**:  
984 5173-5179.
- 985 McClure MA, S.C., Elton P., (1996) Parameterization studies for the SAM and HMMER  
986 methods of hidden markov model generation. In: Proceedings / International Conference  
987 on Intelligent Systems for Molecular Biology. pp.
- 988 Merrell, D.S. & A. Camilli, (2000) Regulation of *vibrio cholerae* genes required for acid  
989 tolerance by a member of the "ToxR-like" family of transcriptional regulators. *J Bacteriol*  
990 **182**: 5342-5350.
- 991 Michael, A.J., (2016a) Biosynthesis of polyamines and polyamine-containing molecules.

- 992 *Biochem J* **473**: 2315-2329.
- 993 Michael, A.J., (2016b) Polyamines in Eukaryotes, Bacteria, and Archaea. *J Biol Chem* **291**:  
994 14896-14903.
- 995 Miller, J., (1972) Experiments in Molecular Genetics. In. C.S.H.L. Press (ed). Cold Spring  
996 Harbor, pp.
- 997 Nguyen, L.T., H.A. Schmidt, A. von Haeseler & B.Q. Minh, (2015) IQ-TREE: a fast and  
998 effective stochastic algorithm for estimating maximum-likelihood phylogenies. *Mol Biol*  
999 *Evol* **32**: 268-274.
- 1000 Ochsner, U.A., M.L. Vasil, E. Alsabbagh, K. Parvatiyar & D.J. Hassett, (2000) Role of the  
1001 *Pseudomonas aeruginosa* oxyR-recG operon in oxidative stress defense and DNA repair:  
1002 OxyR-dependent regulation of katB-ankB, ahpB, and ahpC-ahpF. *J Bacteriol* **182**: 4533-  
1003 4544.
- 1004 Pezzulo, A.A., X.X. Tang, M.J. Hoegger, M.H. Abou Alaiwa, S. Ramachandran, T.O. Moninger,  
1005 P.H. Karp, C.L. Wohlford-Lenane, H.P. Haagsman, M. van Eijk, B. Banfi, A.R. Horswill,  
1006 D.A. Stoltz, P.B. McCray, Jr., M.J. Welsh & J. Zabner, (2012) Reduced airway surface  
1007 pH impairs bacterial killing in the porcine cystic fibrosis lung. *Nature* **487**: 109-113.
- 1008 Rahman, M. & P.H. Clarke, (1980) Genes and enzymes of lysine catabolism in *Pseudomonas*  
1009 *aeruginosa*. *J Gen Microbiol* **116**: 357-369.
- 1010 Ramulu, H.G., M. Groussin, E. Talla, R. Planel, V. Daubin & C. Brochier-Armanet, (2014)  
1011 Ribosomal proteins: toward a next generation standard for prokaryotic systematics? *Mol*  
1012 *Phylogenet Evol* **75**: 103-117.
- 1013 Romano, A., V. Ladero, M.A. Alvarez & P.M. Lucas, (2014) Putrescine production via the  
1014 ornithine decarboxylation pathway improves the acid stress survival of *Lactobacillus*  
1015 *brevis* and is part of a horizontally transferred acid resistance locus. *Int J Food Microbiol*  
1016 **175**: 14-19.
- 1017 Romano, A., H. Trip, J.S. Lolkema & P.M. Lucas, (2013) Three-component lysine/ornithine  
1018 decarboxylation system in *Lactobacillus saerimneri* 30a. *J Bacteriol* **195**: 1249-1254.
- 1019 Ronquist, F. & J.P. Huelsenbeck, (2003) MrBayes 3: Bayesian phylogenetic inference under  
1020 mixed models. *Bioinformatics* **19**: 1572-1574.
- 1021 Schuster, M., A.C. Hawkins, C.S. Harwood & E.P. Greenberg, (2004) The *Pseudomonas*  
1022 *aeruginosa* RpoS regulon and its relationship to quorum sensing. *Mol Microbiol* **51**: 973-  
1023 985.
- 1024 Sekowska, A., P. Bertin & A. Danchin, (1998) Characterization of polyamine synthesis pathway  
1025 in *Bacillus subtilis* 168. *Mol Microbiol* **29**: 851-858.
- 1026 Seo, H. & K.J. Kim, (2017) Structural basis for a novel type of cytokinin-activating protein. *Sci*  
1027 *Rep* **7**: 45985.
- 1028 Sevin, D.C., T. Fuhrer, N. Zamboni & U. Sauer, (2017) Nontargeted in vitro metabolomics for  
1029 high-throughput identification of novel enzymes in *Escherichia coli*. *Nat Methods* **14**:  
1030 187-194.
- 1031 Shah, P. & E. Swiatlo, (2008) A multifaceted role for polyamines in bacterial pathogens. *Mol*  
1032 *Microbiol* **68**: 4-16.
- 1033 Shan, Y., A. Brown Gandt, S.E. Rowe, J.P. Deisinger, B.P. Conlon & K. Lewis, (2017) ATP-  
1034 Dependent Persister Formation in *Escherichia coli*. *MBio* **8**.
- 1035 Snider, J., I. Gutsche, M. Lin, S. Baby, B. Cox, G. Butland, J. Greenblatt, A. Emili & W.A.  
1036 Houry, (2006) Formation of a distinctive complex between the inducible bacterial lysine  
1037 decarboxylase and a novel AAA+ ATPase. *J Biol Chem* **281**: 1532-1546.
- 1038 Soksawatmaekhin, W., A. Kuraishi, K. Sakata, K. Kashiwagi & K. Igarashi, (2004) Excretion

- 1039 and uptake of cadaverine by CadB and its physiological functions in *Escherichia coli*. *Mol*  
1040 *Microbiol* **51**: 1401-1412.
- 1041 Stover, C.K., X.Q. Pham, A.L. Erwin, S.D. Mizoguchi, P. Warren, M.J. Hickey, F.S.  
1042 Brinkman, W.O. Hufnagle, D.J. Kowalik, M. Lagrou, R.L. Garber, L. Goltry, E.  
1043 Tolentino, S. Westbrook-Wadman, Y. Yuan, L.L. Brody, S.N. Coulter, K.R. Folger, A.  
1044 Kas, K. Larbig, R. Lim, K. Smith, D. Spencer, G.K. Wong, Z. Wu, I.T. Paulsen, J. Reizer,  
1045 M.H. Saier, R.E. Hancock, S. Lory & M.V. Olson, (2000) Complete genome sequence of  
1046 *Pseudomonas aeruginosa* PAO1, an opportunistic pathogen. *Nature* **406**: 959-964.
- 1047 Sugawara, A., D. Matsui, N. Takahashi, M. Yamada, Y. Asano & K. Isobe, (2014)  
1048 Characterization of a pyridoxal-5'-phosphate-dependent l-lysine decarboxylase/oxidase  
1049 from *Burkholderia* sp. AIU 395. *J Biosci Bioeng* **118**: 496-501.
- 1050 Tabor, C.W. & H. Tabor, (1985) Polyamines in microorganisms. *Microbiol Rev* **49**: 81-99.
- 1051 Tabor, H., E.W. Hafner & C.W. Tabor, (1980) Construction of an *Escherichia coli* strain unable  
1052 to synthesize putrescine, spermidine, or cadaverine: characterization of two genes  
1053 controlling lysine decarboxylase. *J Bacteriol* **144**: 952-956.
- 1054 Tabor, H. & C.W. Tabor, (1964) Spermidine, Spermine, and Related Amines. *Pharmacol Rev* **16**:  
1055 245-300.
- 1056 Takatsuka, Y., Y. Yamaguchi, M. Ono & Y. Kamio, (2000) Gene cloning and molecular  
1057 characterization of lysine decarboxylase from *Selenomonas ruminantium* delineate its  
1058 evolutionary relationship to ornithine decarboxylases from eukaryotes. *J Bacteriol* **182**:  
1059 6732-6741.
- 1060 Thibault, J., E. Faudry, C. Ebel, I. Attree & S. Elsen, (2009) Anti-activator ExsD forms a 1:1  
1061 complex with ExsA to inhibit transcription of type III secretion operons. *J Biol Chem* **284**:  
1062 15762-15770.
- 1063 Valot, B., C. Guyeux, J.Y. Rolland, K. Mazouzi, X. Bertrand & D. Hocquet, (2015) What It  
1064 Takes to Be a *Pseudomonas aeruginosa*? The Core Genome of the Opportunistic Pathogen  
1065 Updated. *PLoS One* **10**: e0126468.
- 1066 Viala, J.P., S. Meresse, B. Pocachard, A.A. Guilhon, L. Aussel & F. Barras, (2011) Sensing and  
1067 adaptation to low pH mediated by inducible amino acid decarboxylases in *Salmonella*.  
1068 *PLoS One* **6**: e22397.
- 1069 Zhao, B. & W.A. Houry, (2010) Acid stress response in enteropathogenic gammaproteobacteria:  
1070 an aptitude for survival. *Biochem Cell Biol* **88**: 301-314.
- 1071  
1072

**A**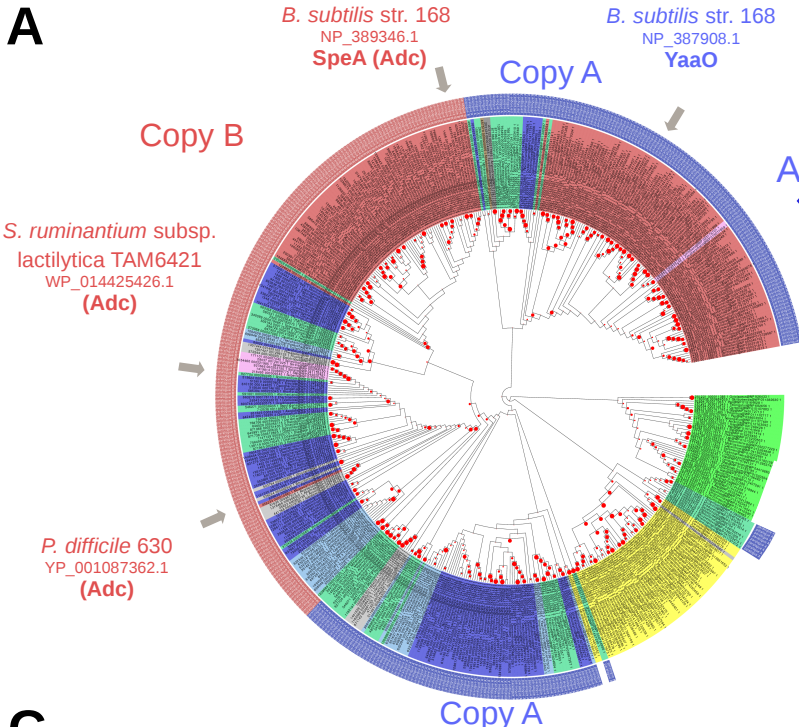**B**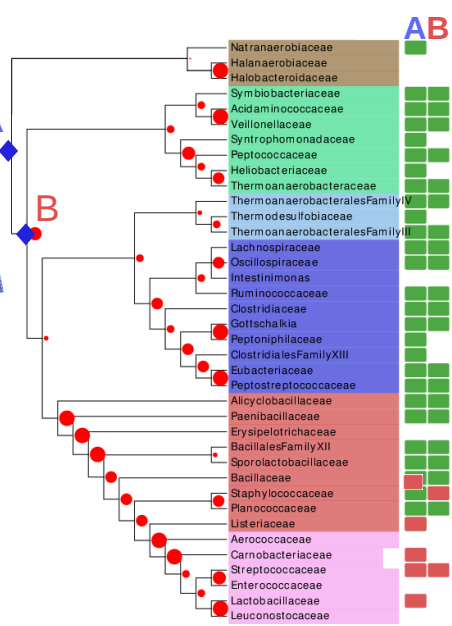**C**

- A**
- Peptoclostridium difficile 630**  
YP\_001090072.1  
NC\_009089.1 (genomic)
  - SeLenomonas ruminantium subsp. lactilytica TAM6421**  
WP\_014423651.1  
NC\_017068.1 (chromosome)
  - Bacillus subtilis subsp. subtilis str. 168**  
NC\_00964.3 (chromosome)
  - Paenibacillus bovis BD3526**  
WP\_060531710.1  
NZ\_CP013023.1 (chromosome)
- B**
- Peptoclostridium difficile 630**  
YP\_001087362.1  
NC\_009089.1 (genomic)
  - SeLenomonas ruminantium subsp. lactilytica TAM6421**  
WP\_014425426.1  
NC\_017068.1 (chromosome)
  - Bacillus subtilis subsp. subtilis str. 168**  
NP\_389346.1  
NC\_00964.3 (chromosome)
  - Paenibacillus bovis BD3526**  
WP\_060535746.1  
NZ\_CP013023.1 (chromosome)

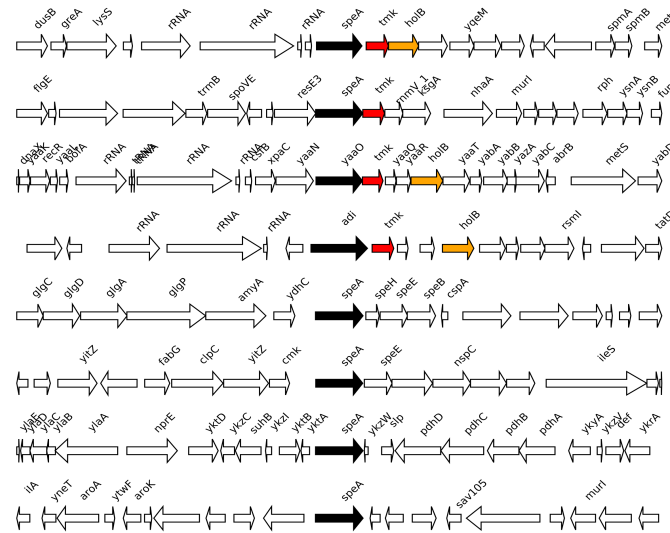

**A**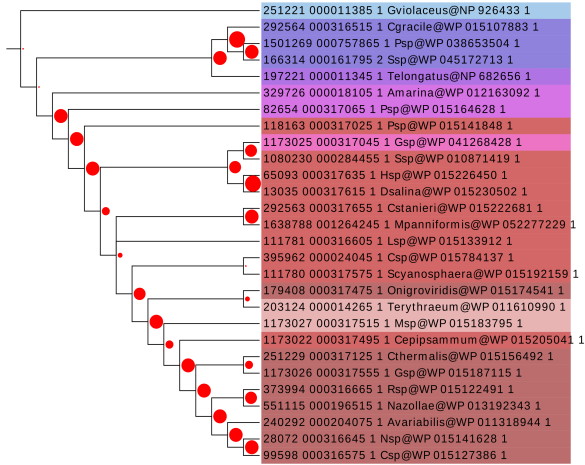**B**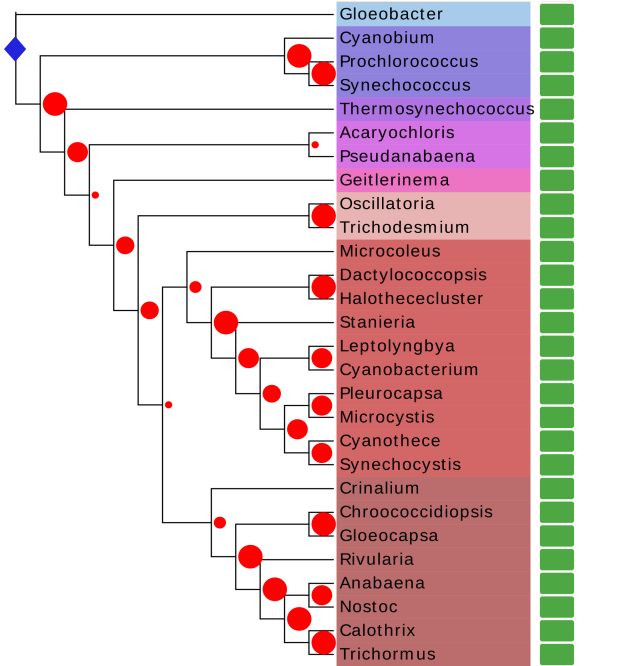**C****Synechococcus sp. WH 8109**

WP\_045172713.1  
 NZ\_CP006882.1 (chromosome)

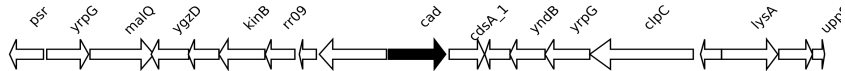**Acaryochloris marina MBIC11017**

WP\_012163092.1  
 NC\_009925.1 (chromosome)

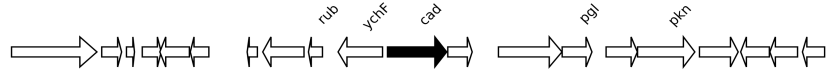**Cyanobacterium stanieri PCC 7202**

WP\_015222681.1  
 NC\_019778.1 (chromosome)

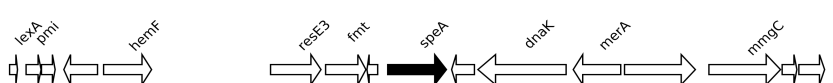**Anabaena variabilis ATCC 29413**

WP\_011318944.1  
 NC\_007413.1 (chromosome)

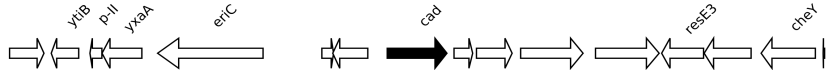

**A**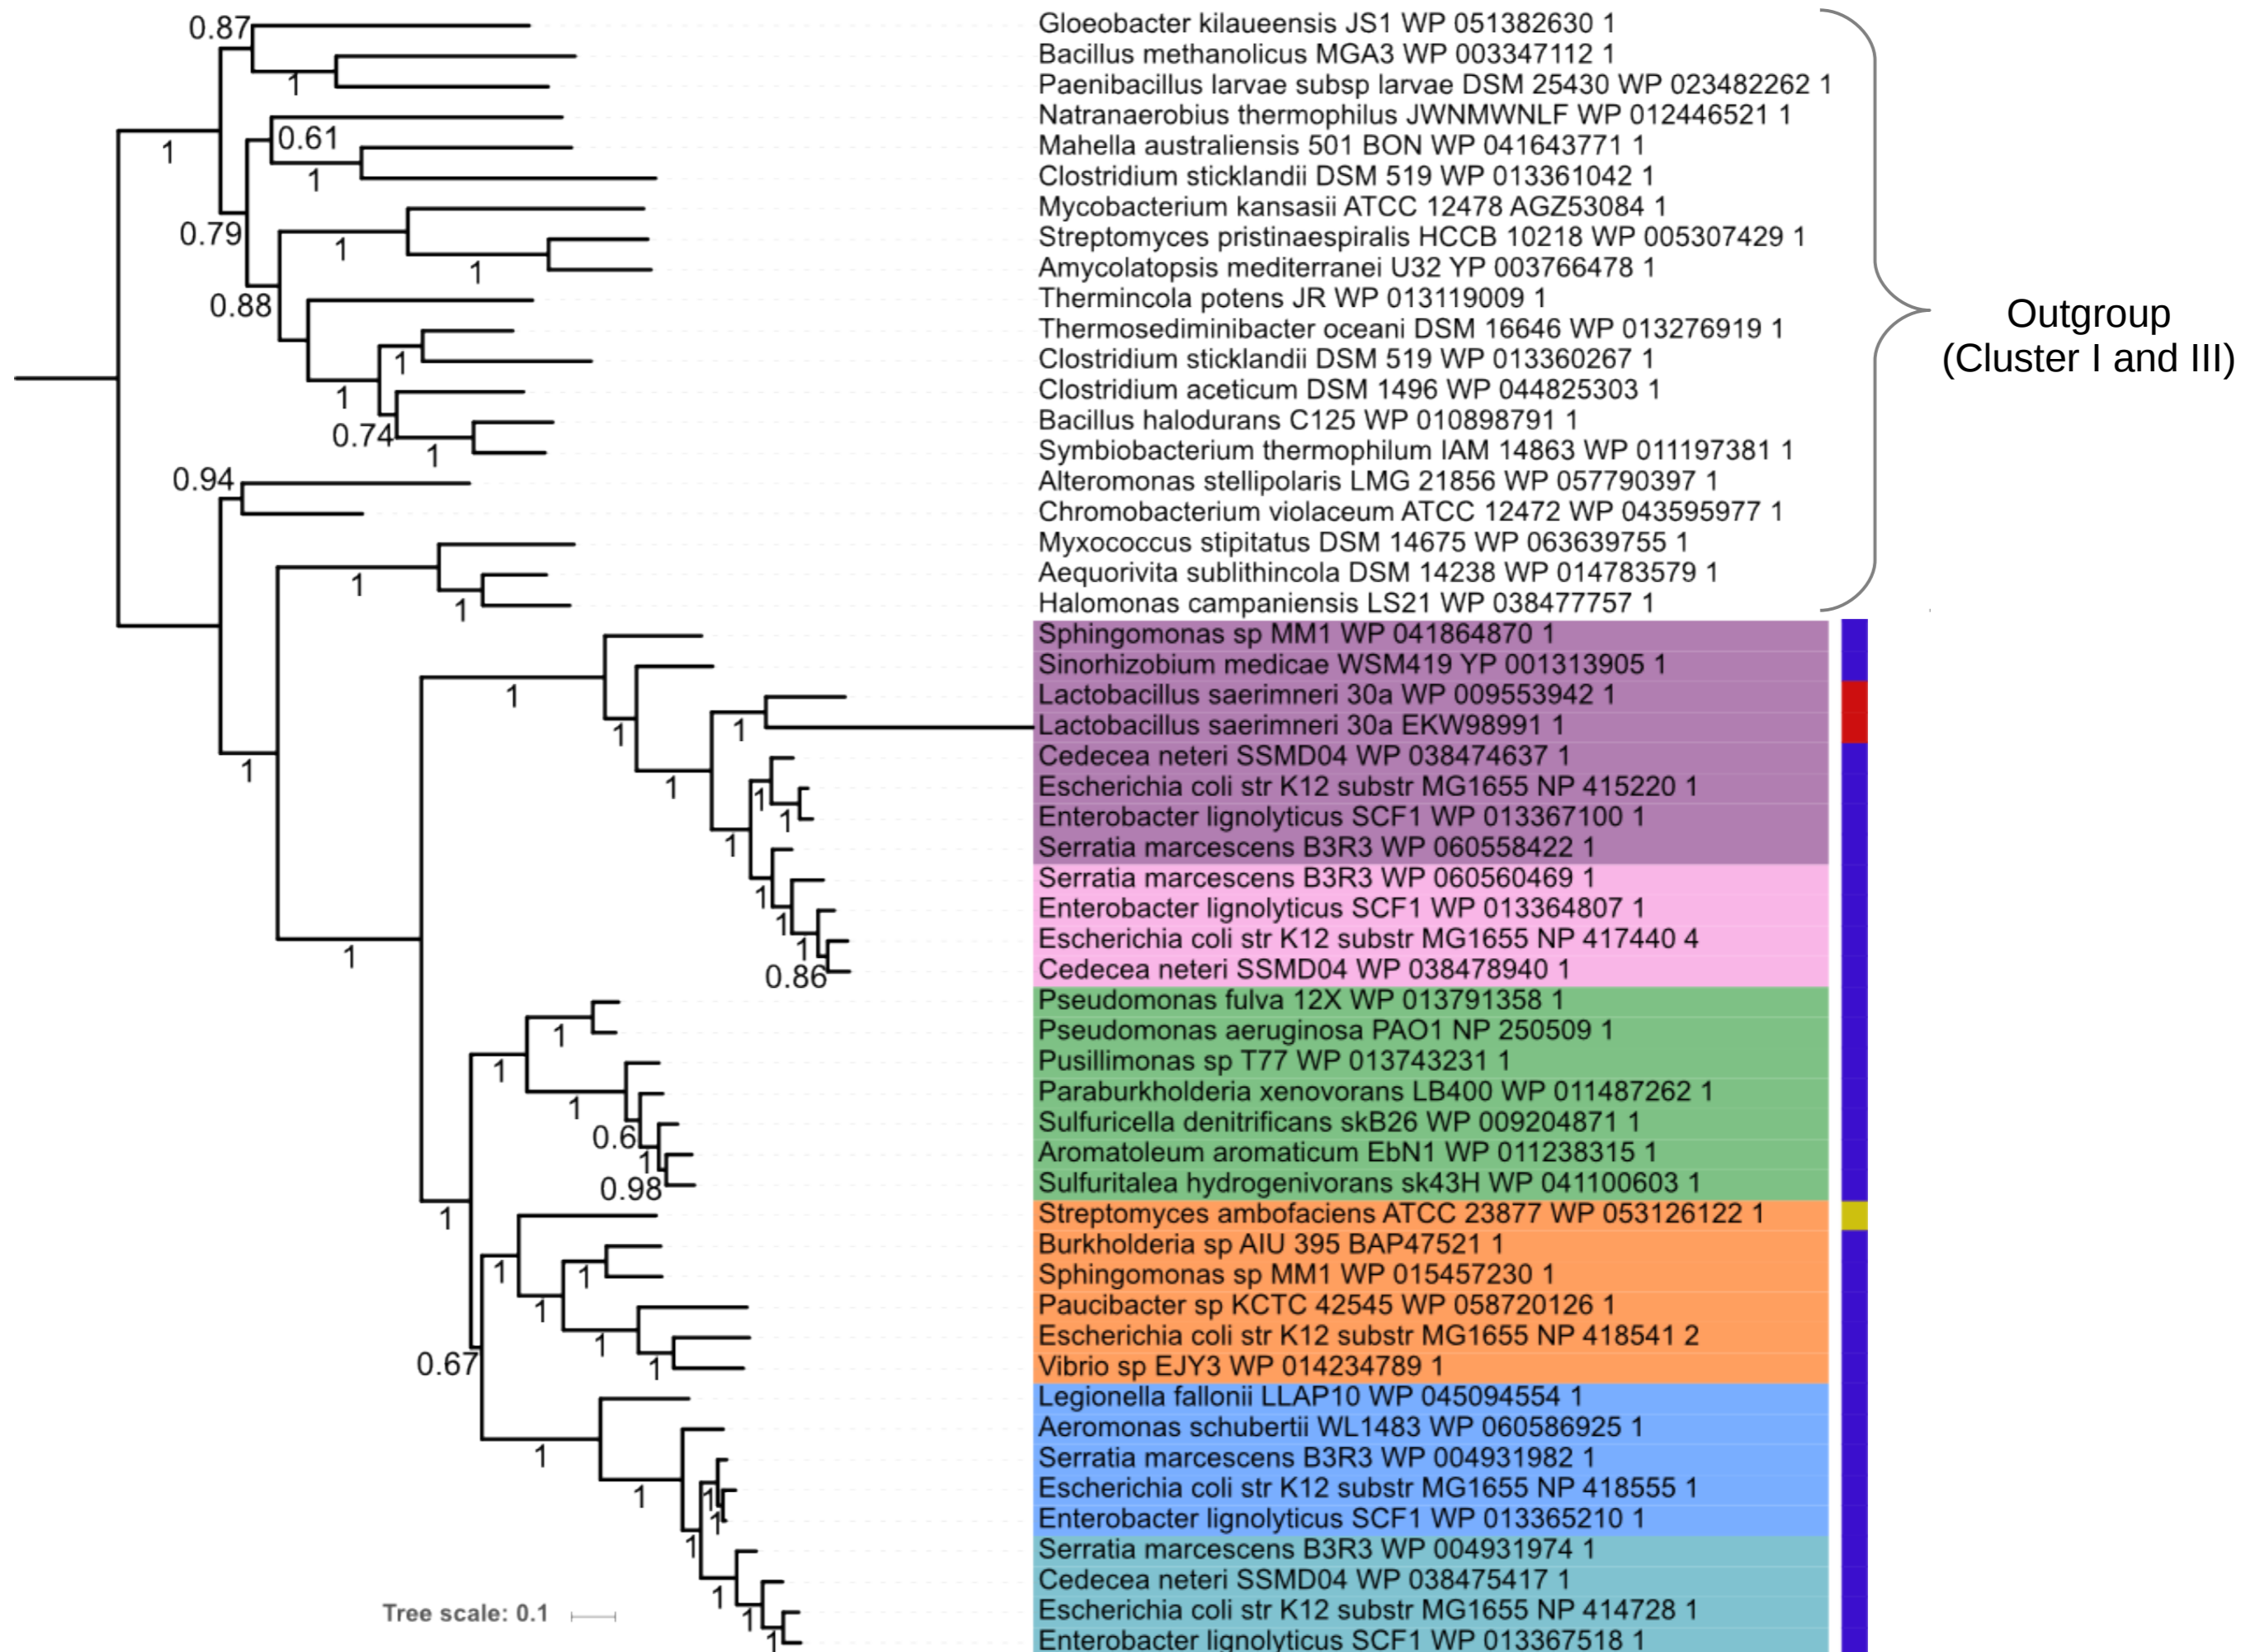**B**

bioRxiv preprint doi: <https://doi.org/10.1101/308080>; this version posted May 26, 2018. The copyright holder for this preprint (which was not certified by peer review) is the author/funder. All rights reserved. No reuse allowed without permission.

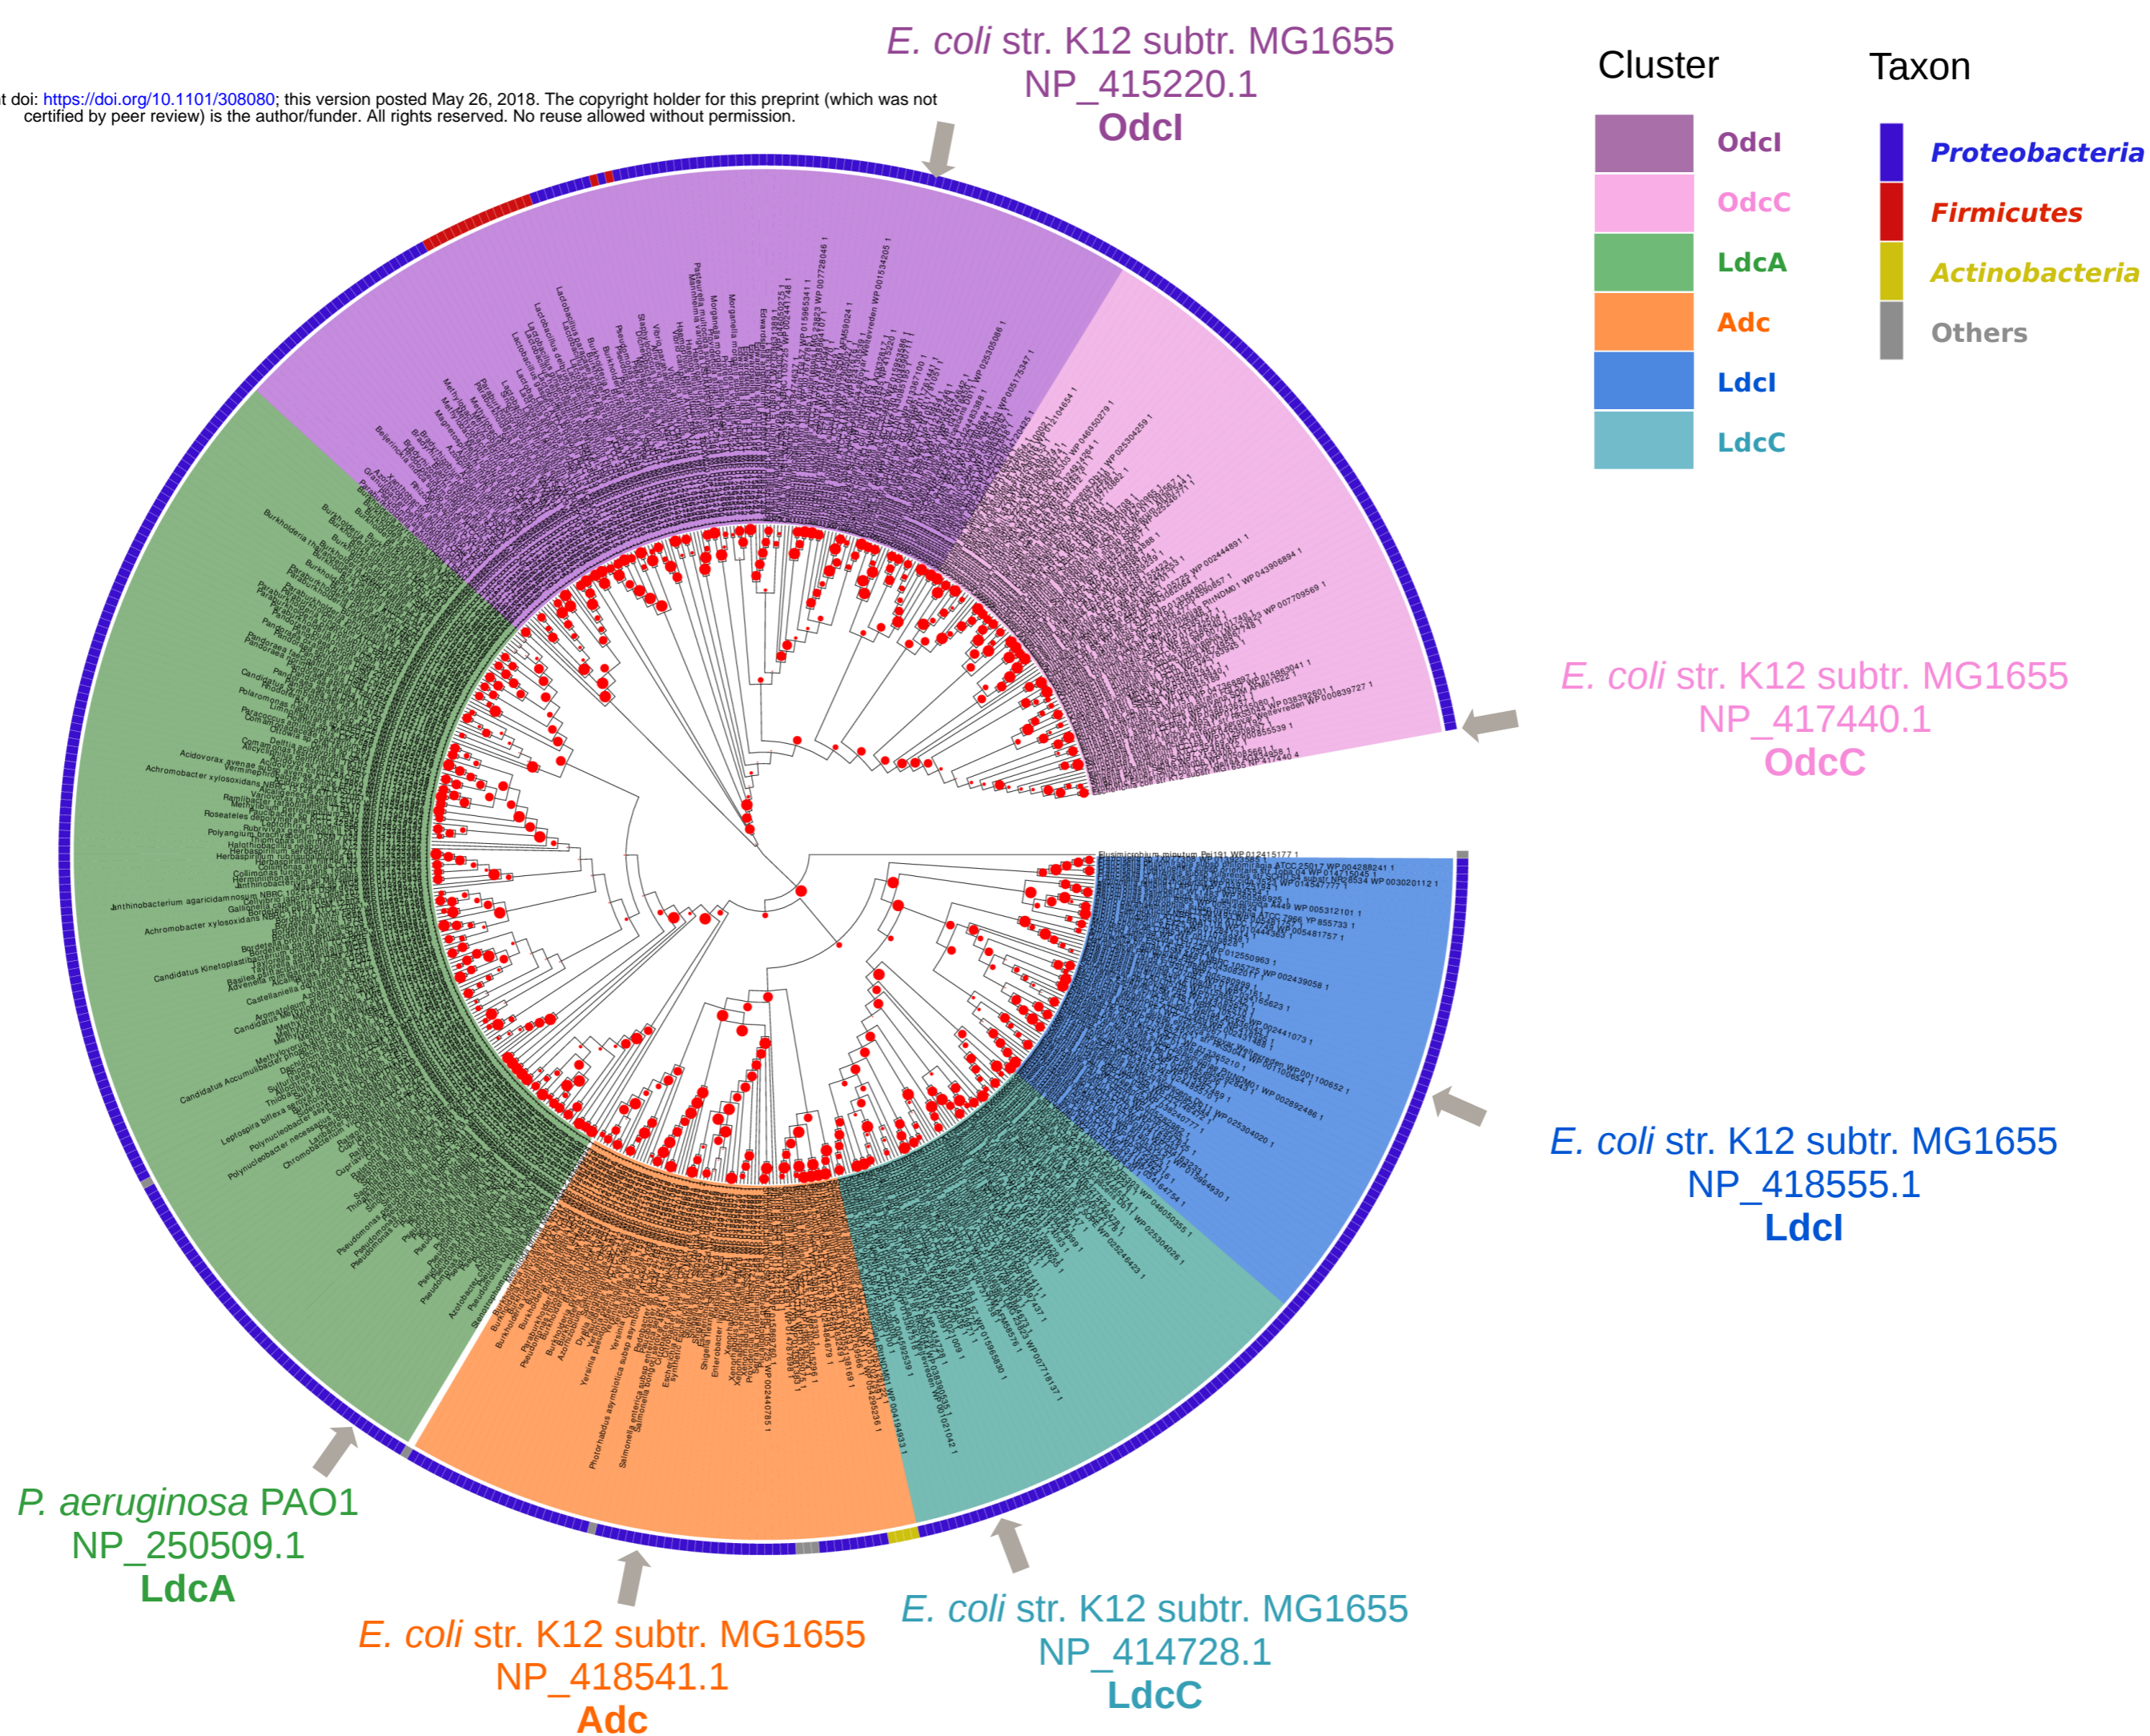

**A**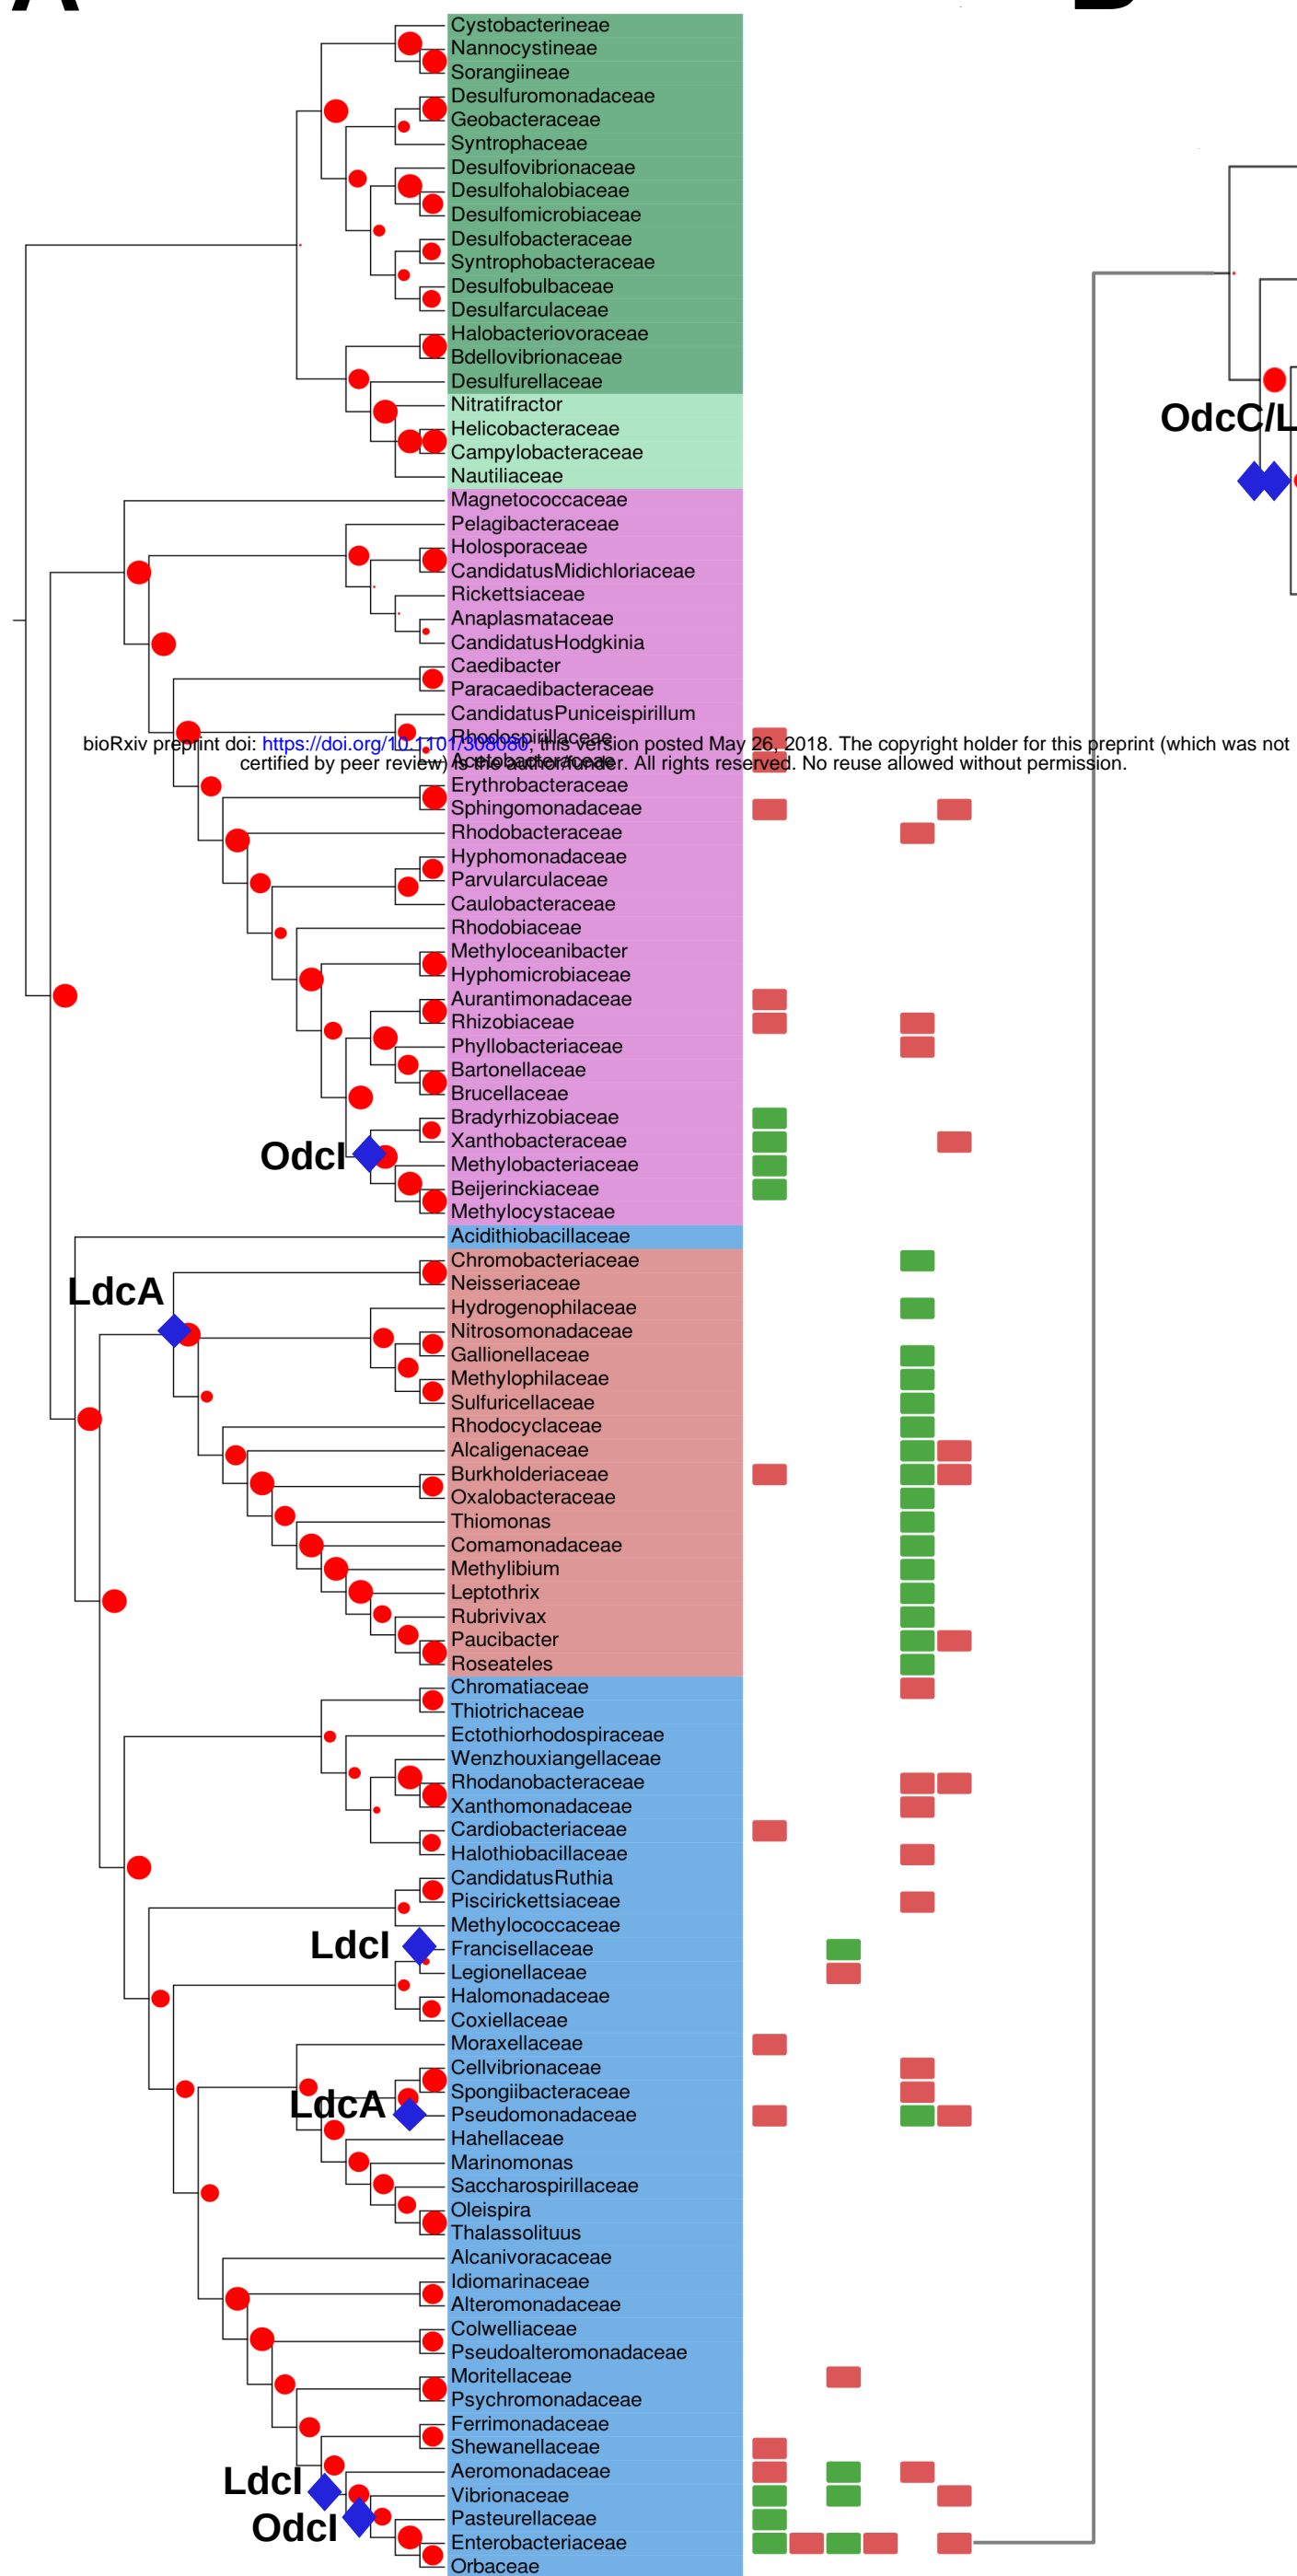**B**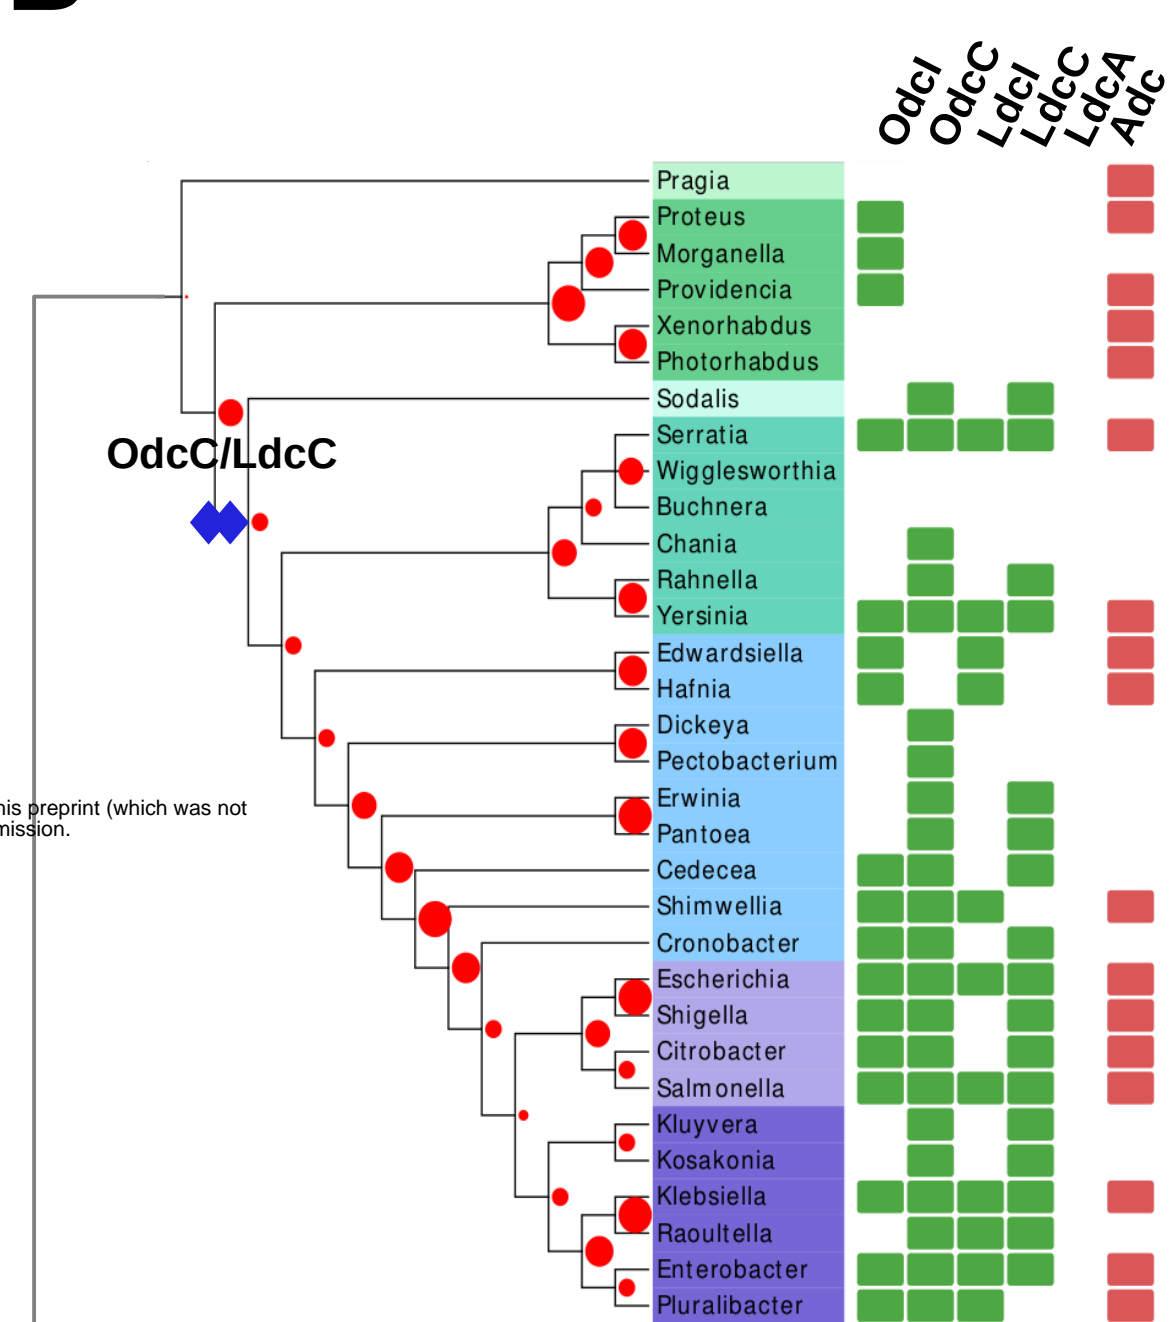

**A**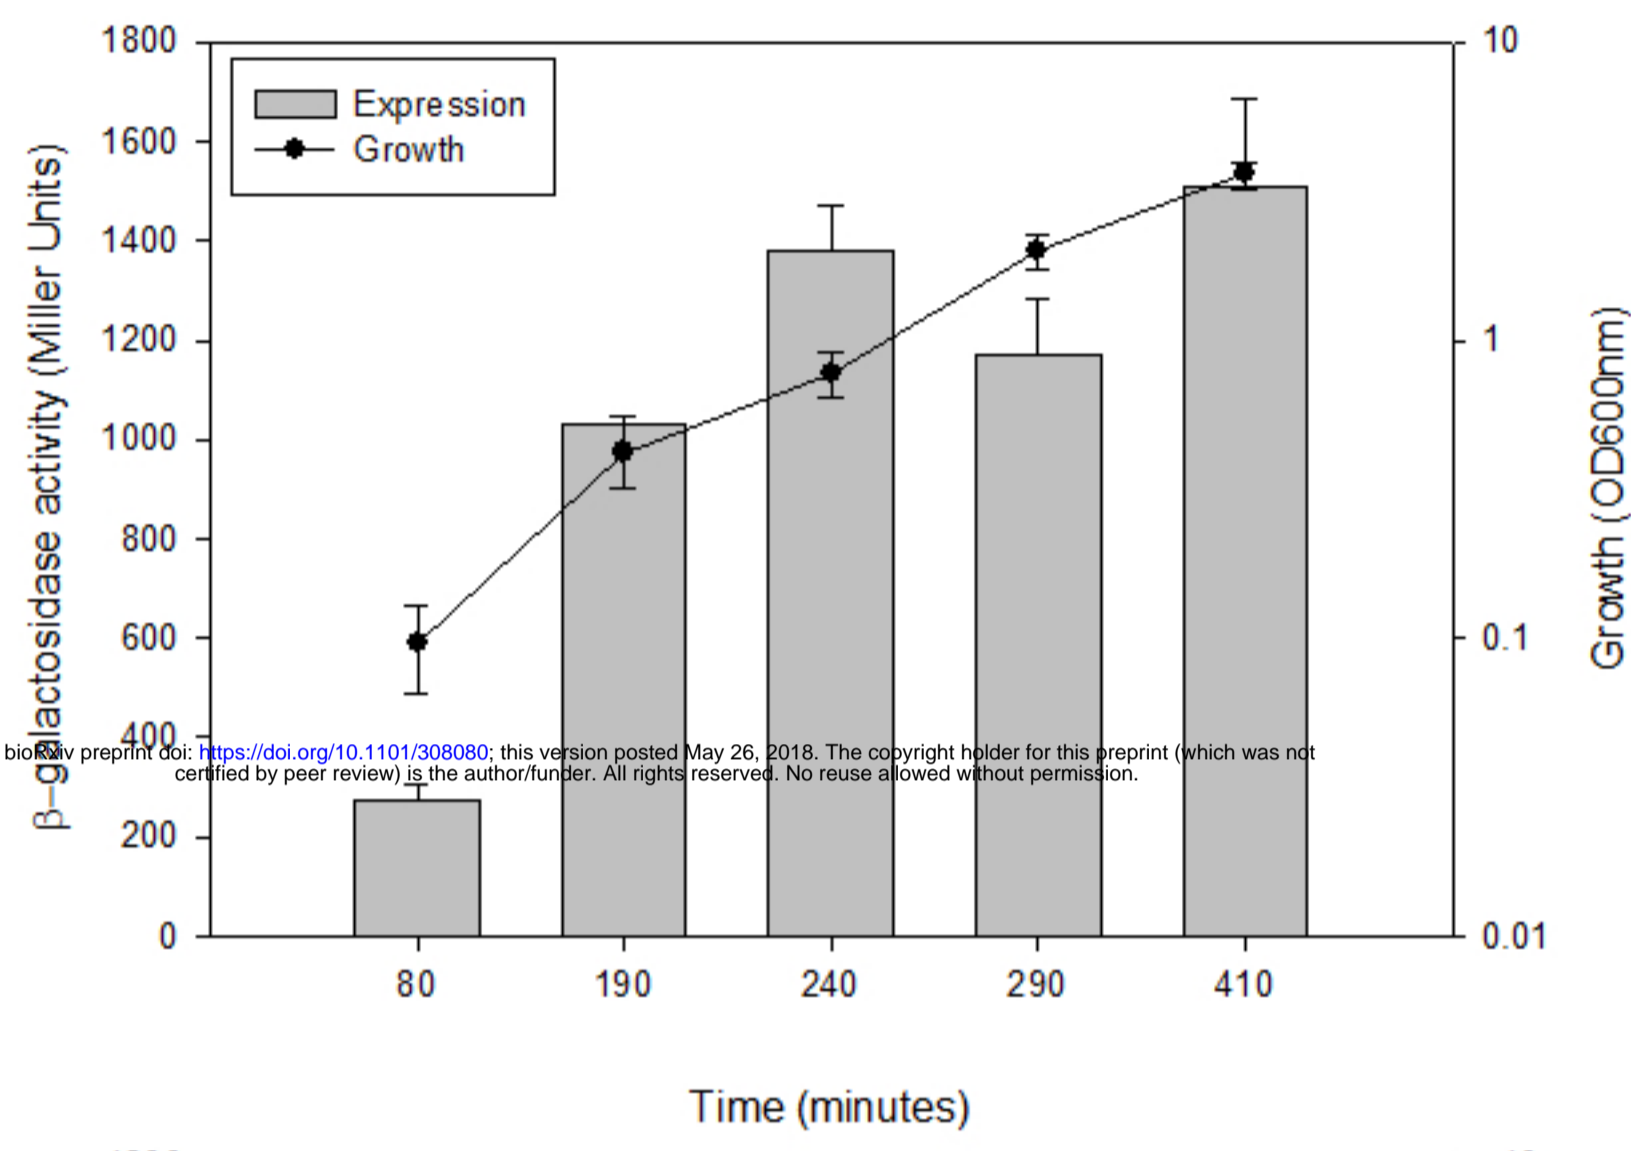

bioRxiv preprint doi: <https://doi.org/10.1101/308080>; this version posted May 26, 2018. The copyright holder for this preprint (which was not certified by peer review) is the author/funder. All rights reserved. No reuse allowed without permission.

**B**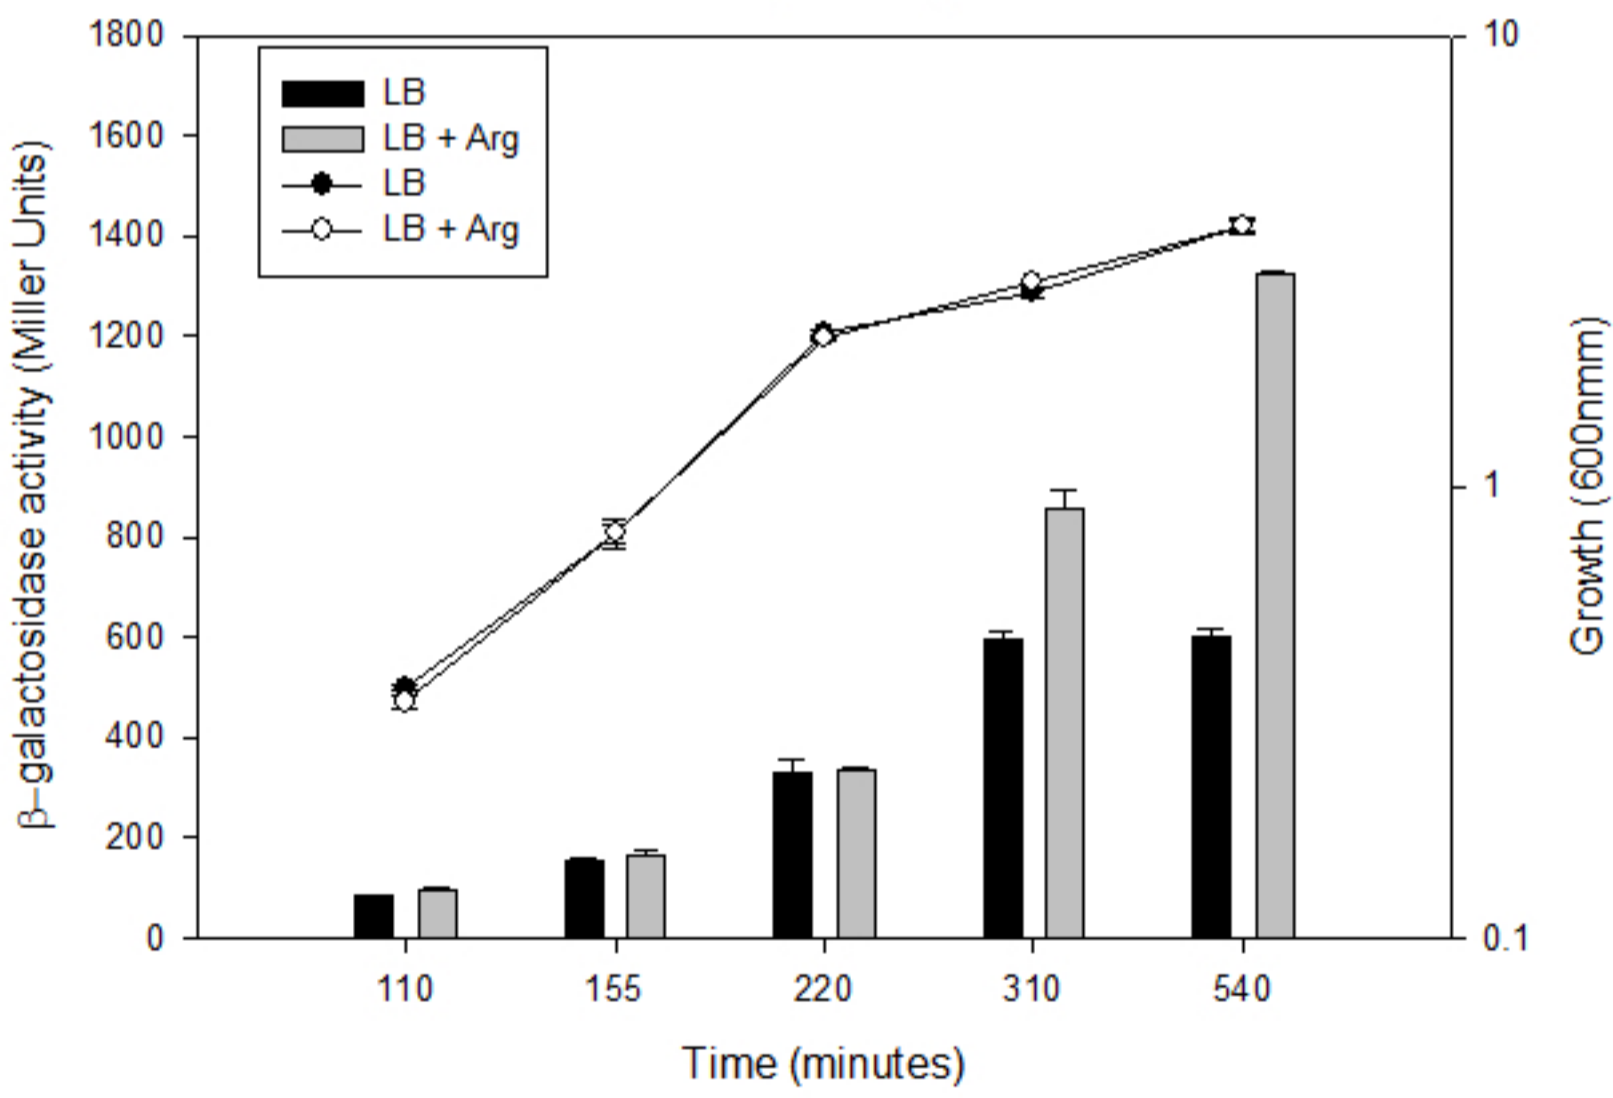



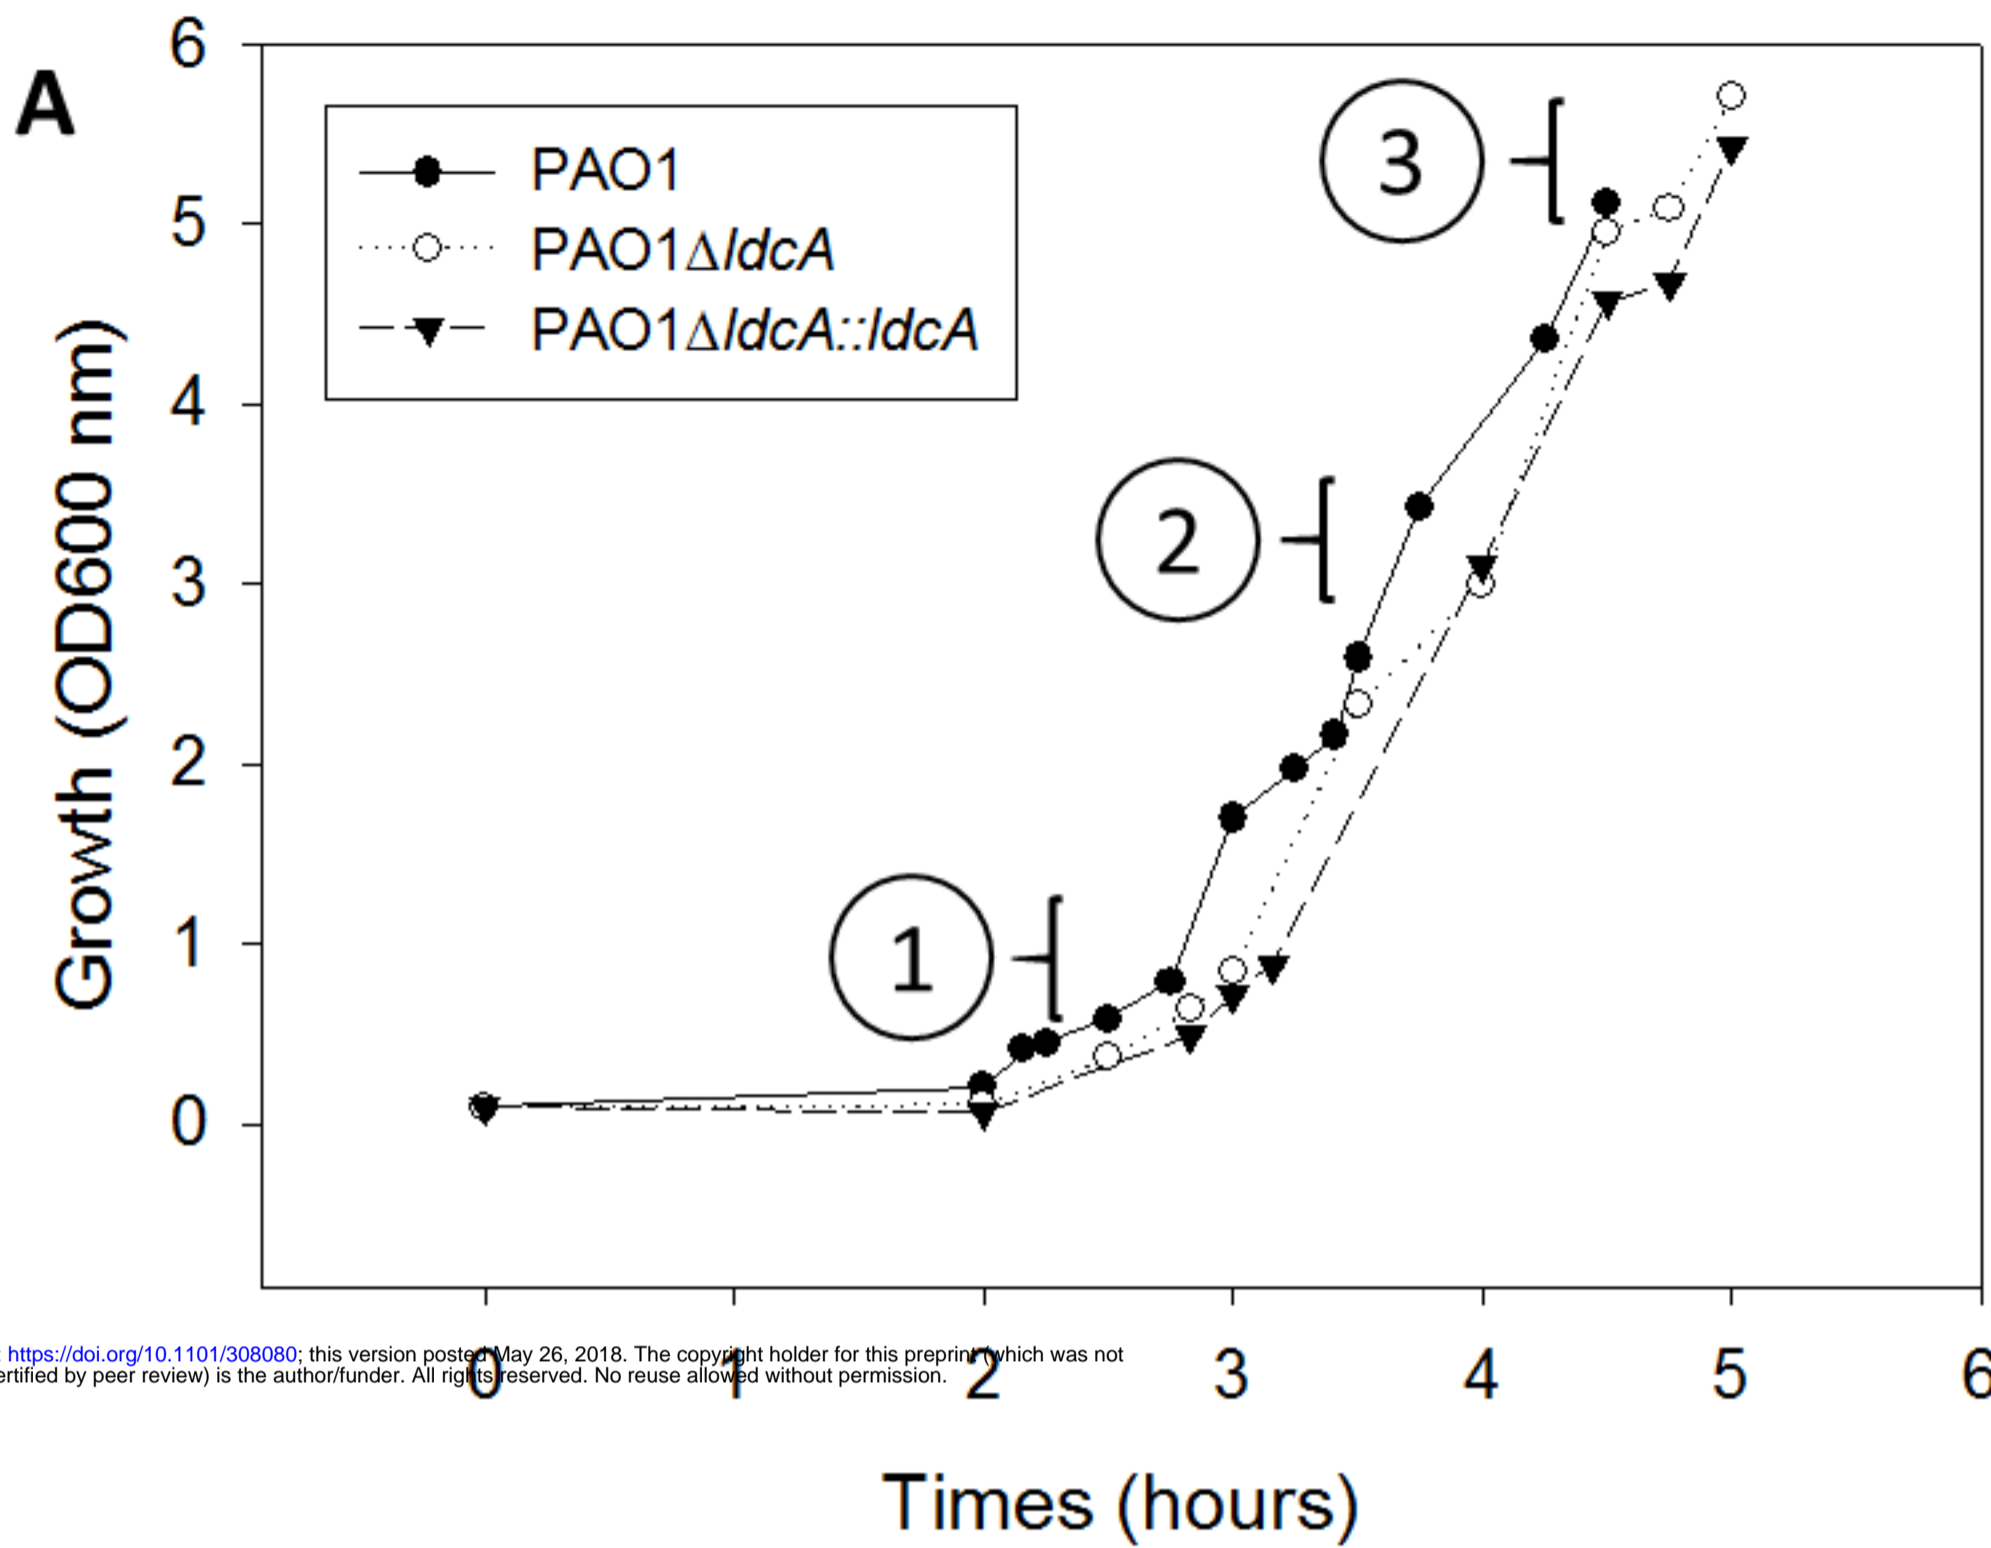

bioRxiv preprint doi: <https://doi.org/10.1101/308080>; this version posted May 26, 2018. The copyright holder for this preprint (which was not certified by peer review) is the author/funder. All rights reserved. No reuse allowed without permission.

**B**

cadaverine

putrescine

spermidine

3

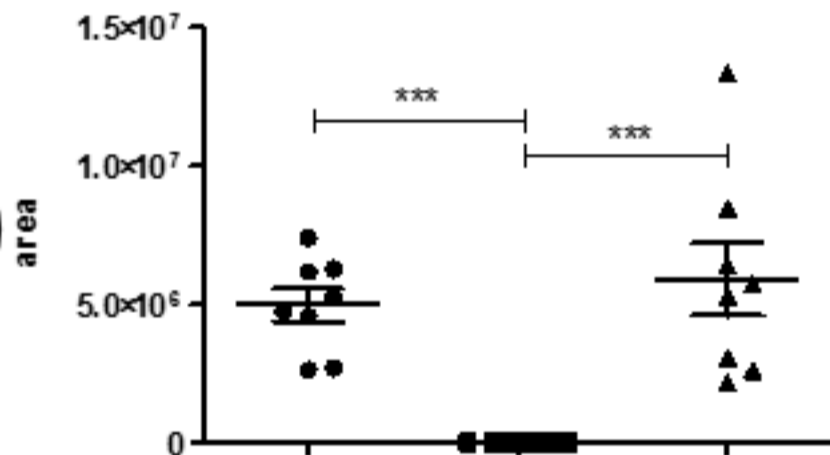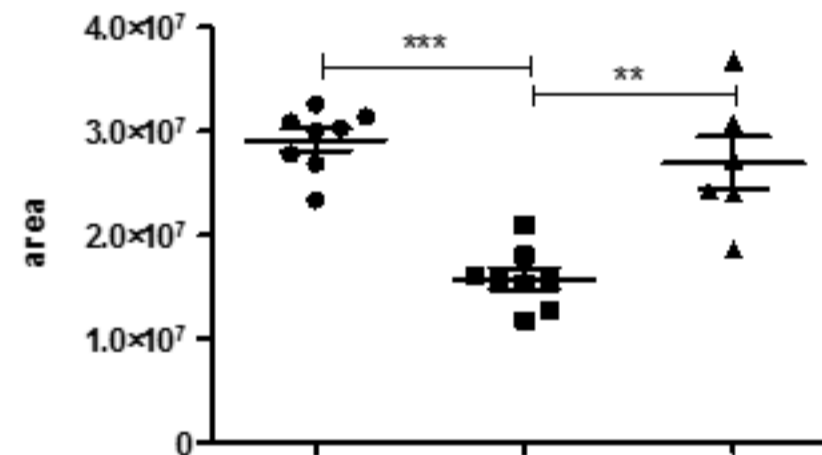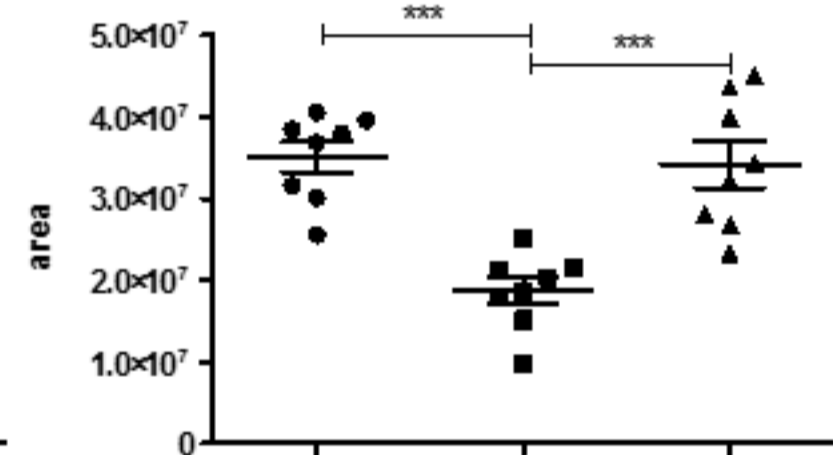

2

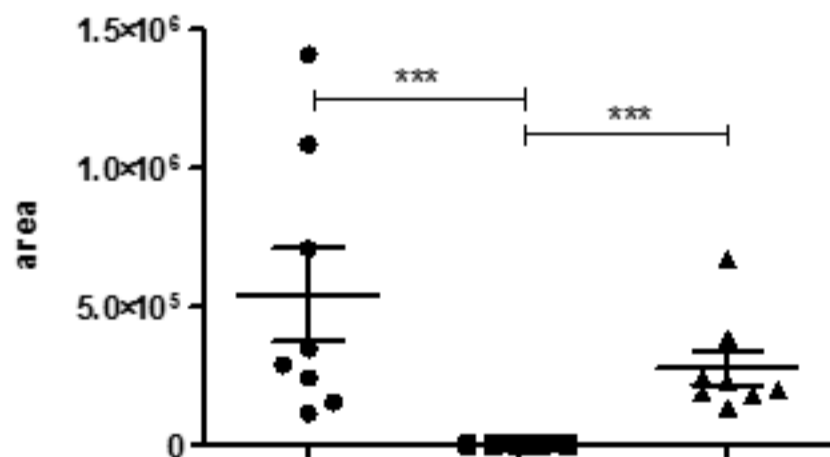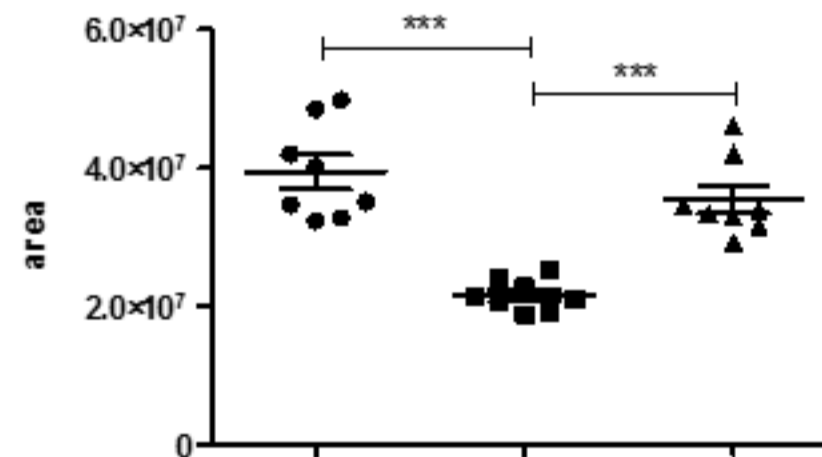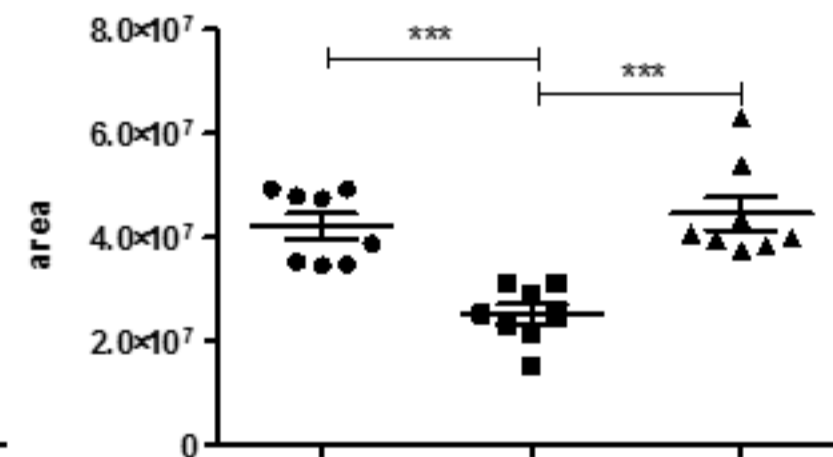

1

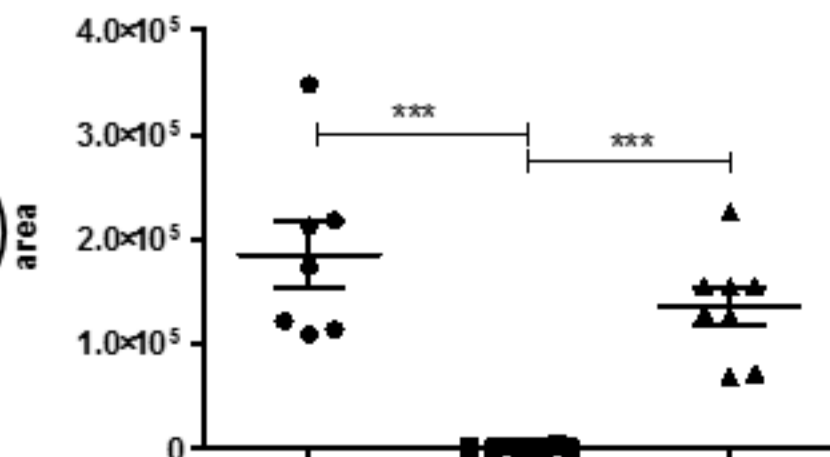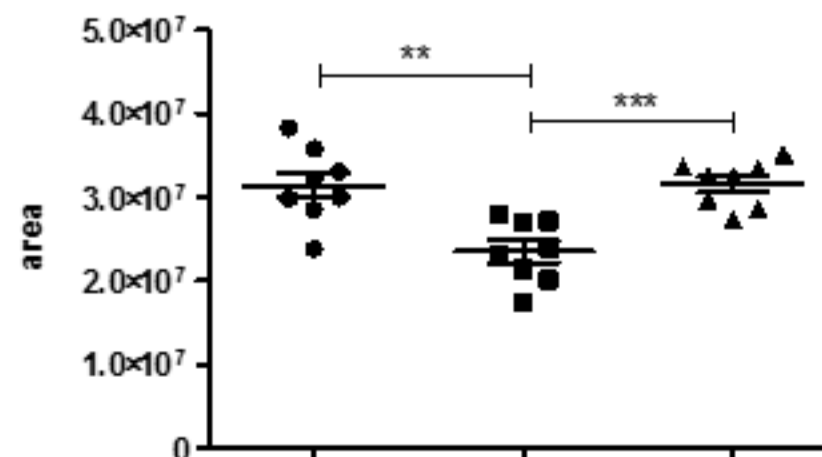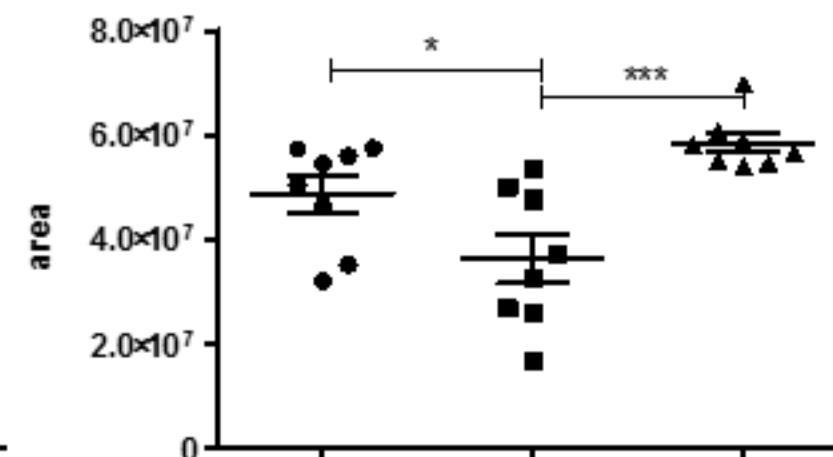

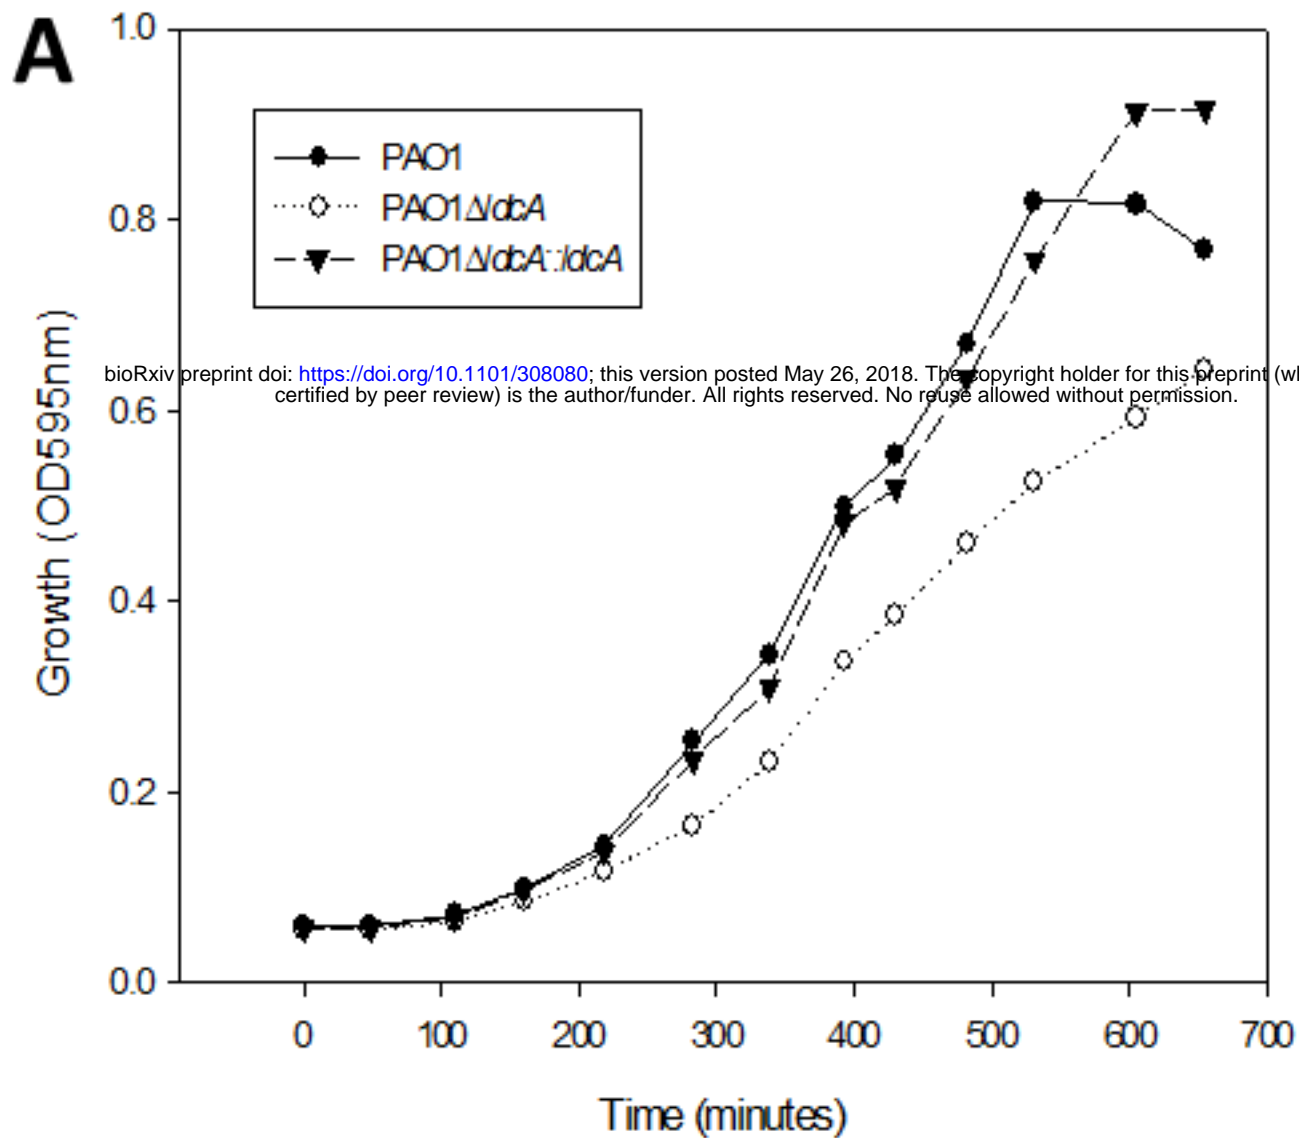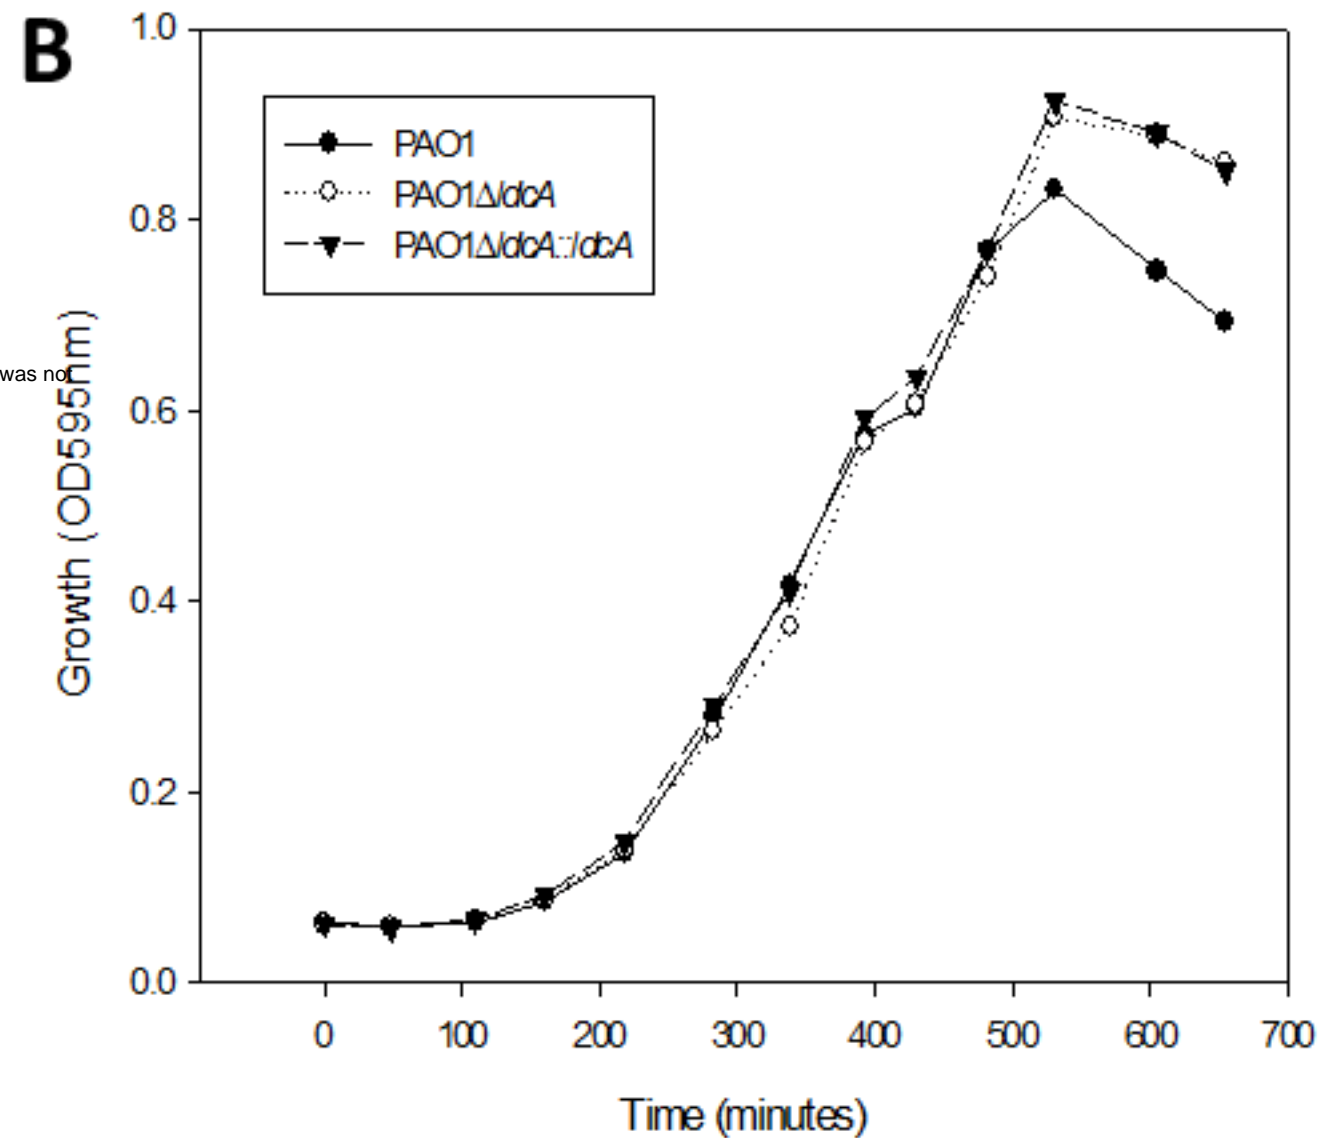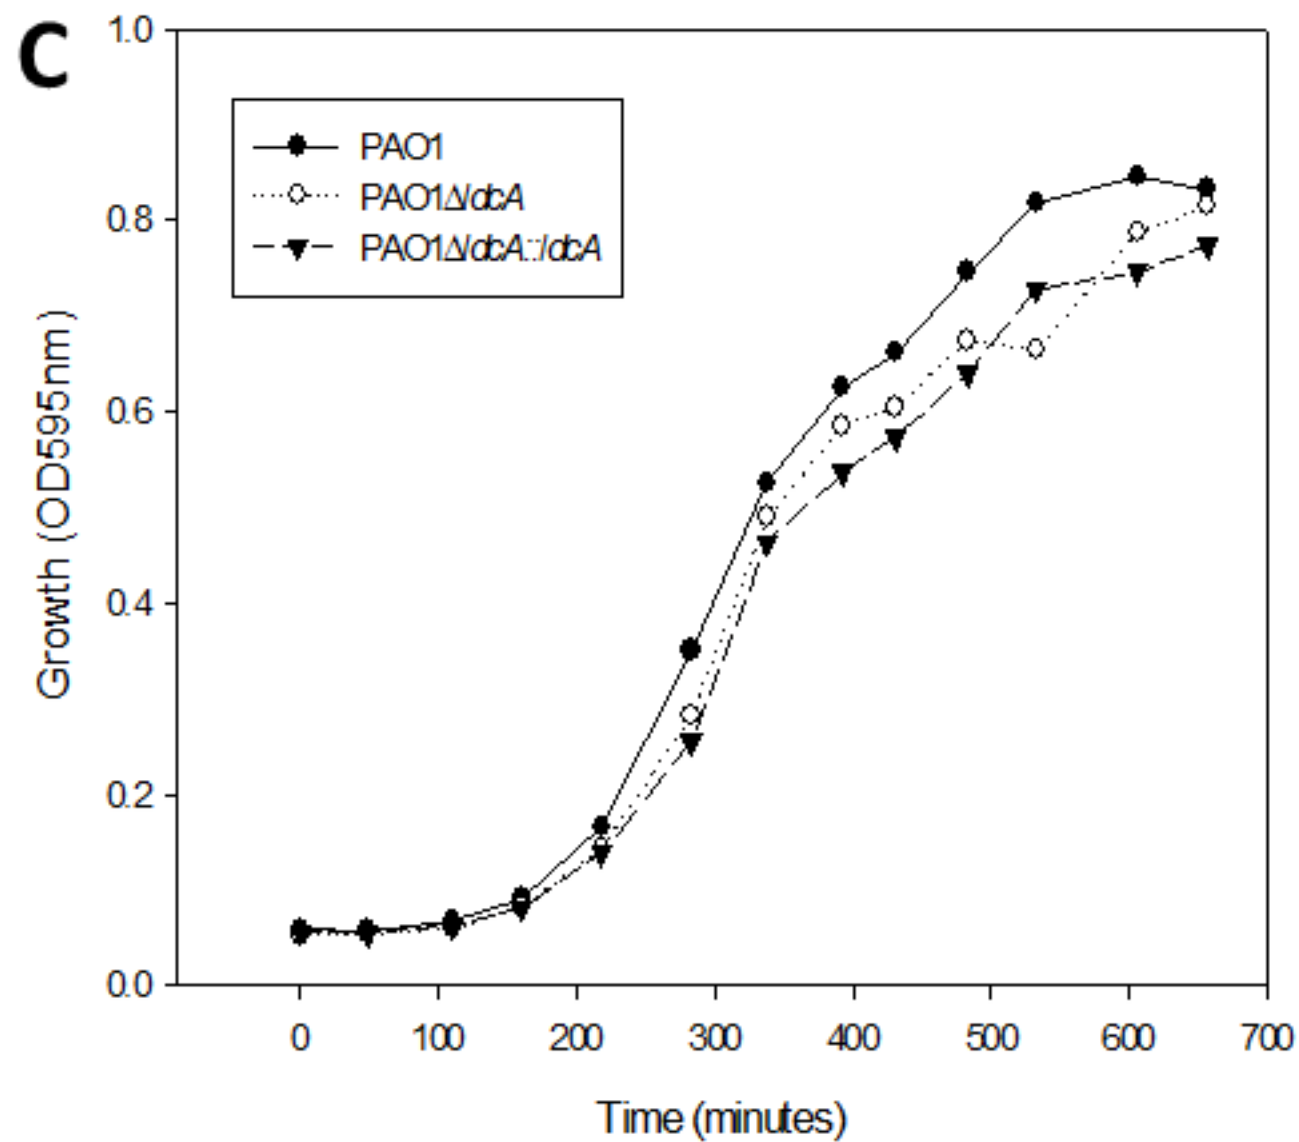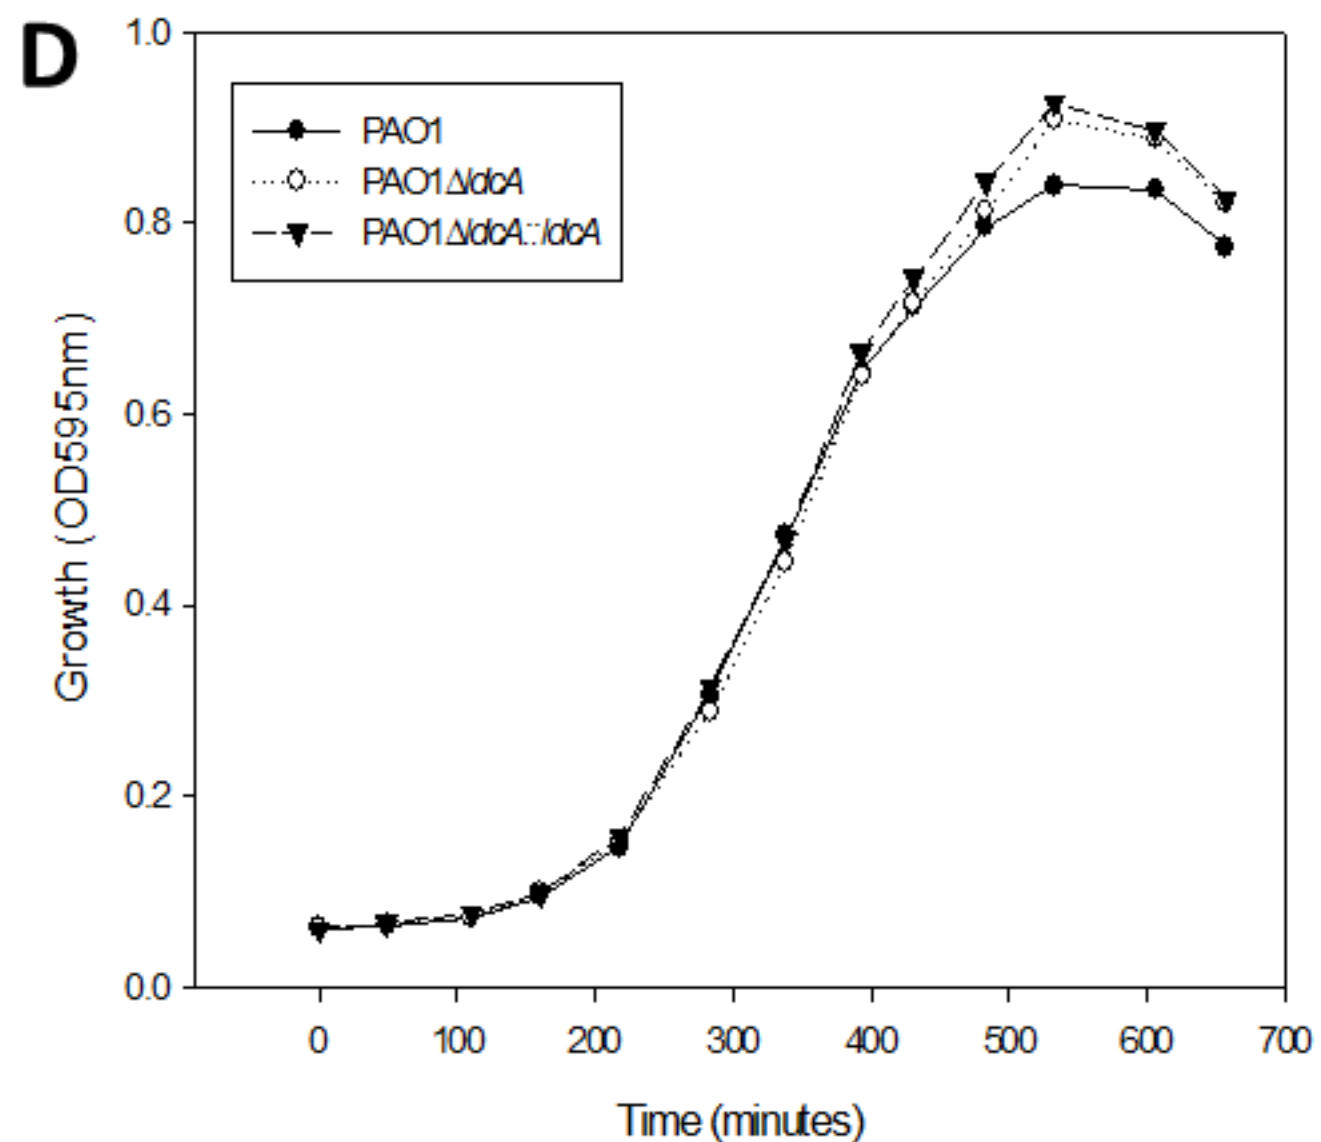

Source: https://www.biorxiv.org/content/10.1101/308080v2.full.pdf
